# Supplementary material for: Structural Variations in the Central Heterocyclic Scaffold of Tripartite 2,6-Difluorobenzamides: Influence on Their Antibacterial Activity against MDR Staphylococcus aureus
Source: MDPI journal article supplement (doi:10.3390/molecules27196619), 2022-10-05

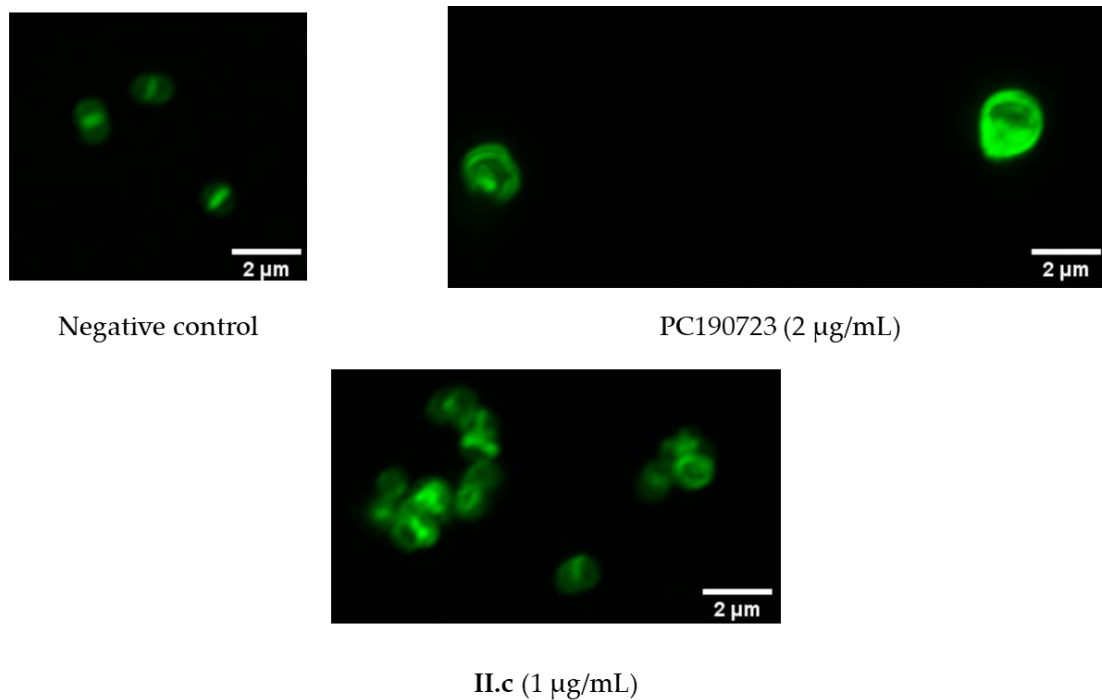

Figure S1. Fluorescence microscope images of SF8300 bacteria stained with vancomycin-bodipy conjugate in presence or absence of antibacterial agent.

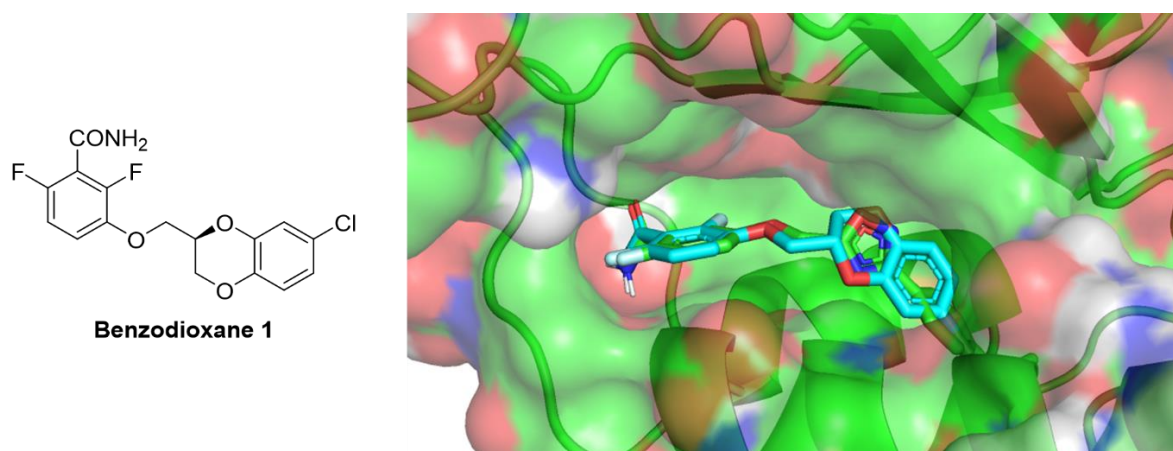

Figure S2: Superimposition of docking results of compound **II.c** (green) and **benzodioxane 1** (cyan) within the allosteric binding site of FtsZ.

| Compound                                                   | V.b                                                                                |                                                                                     |
|------------------------------------------------------------|------------------------------------------------------------------------------------|-------------------------------------------------------------------------------------|
| Enantiomer                                                 | (R)                                                                                | (S)                                                                                 |
| Structure                                                  | 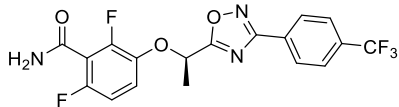  |  |
| Docking and superimposition with co-crystallized inhibitor |  |  |

  

| Compound                                                   | V.c                                                                                 |                                                                                      |
|------------------------------------------------------------|-------------------------------------------------------------------------------------|--------------------------------------------------------------------------------------|
| Enantiomer                                                 | (R)                                                                                 | (S)                                                                                  |
| Structure                                                  |    |   |
| Docking and superimposition with co-crystallized inhibitor |  |  |

Figure S3: Docking of both enantiomers of compound **V.b** and **V.c** within the allosteric binding site of FtsZ (PDB code: 6KVP) [6] . Docking results (cyan) are superimposed with the co-crystallized oxazole inhibitor (magenta).

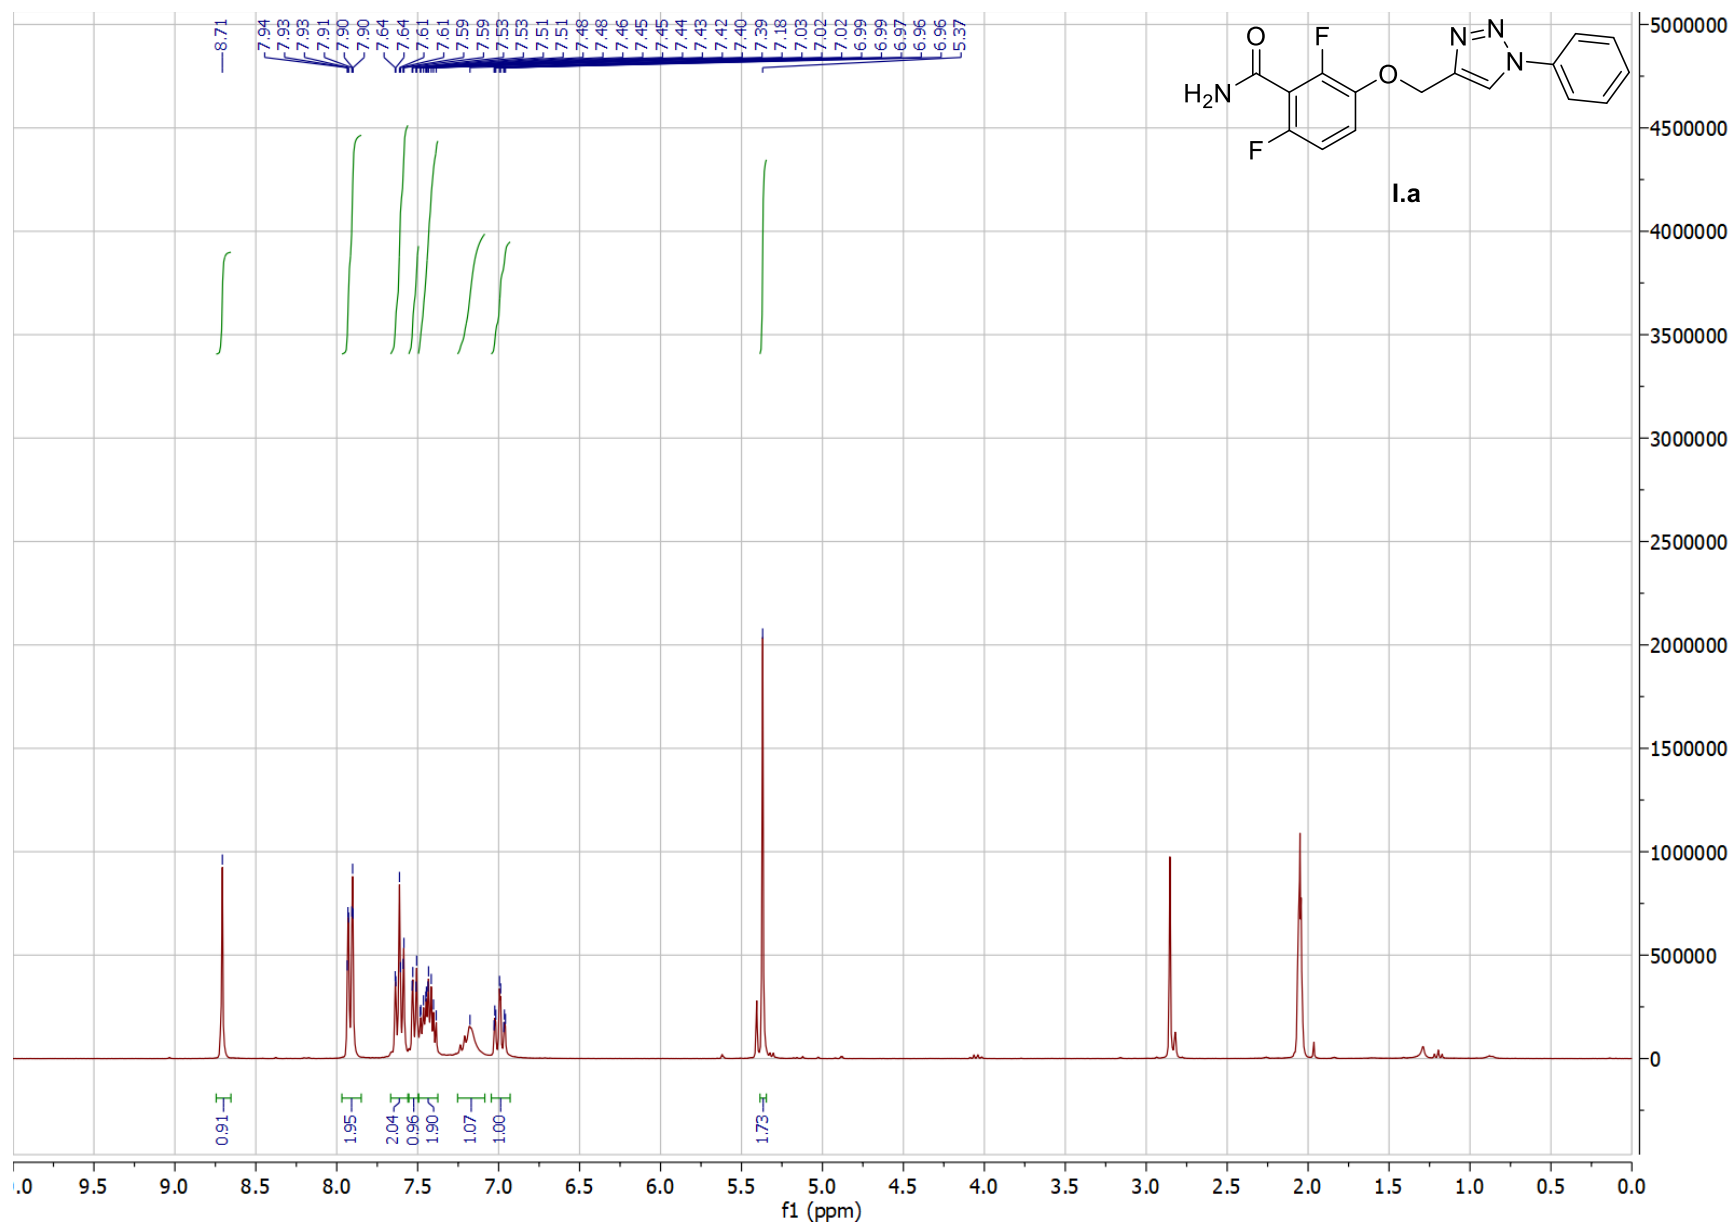

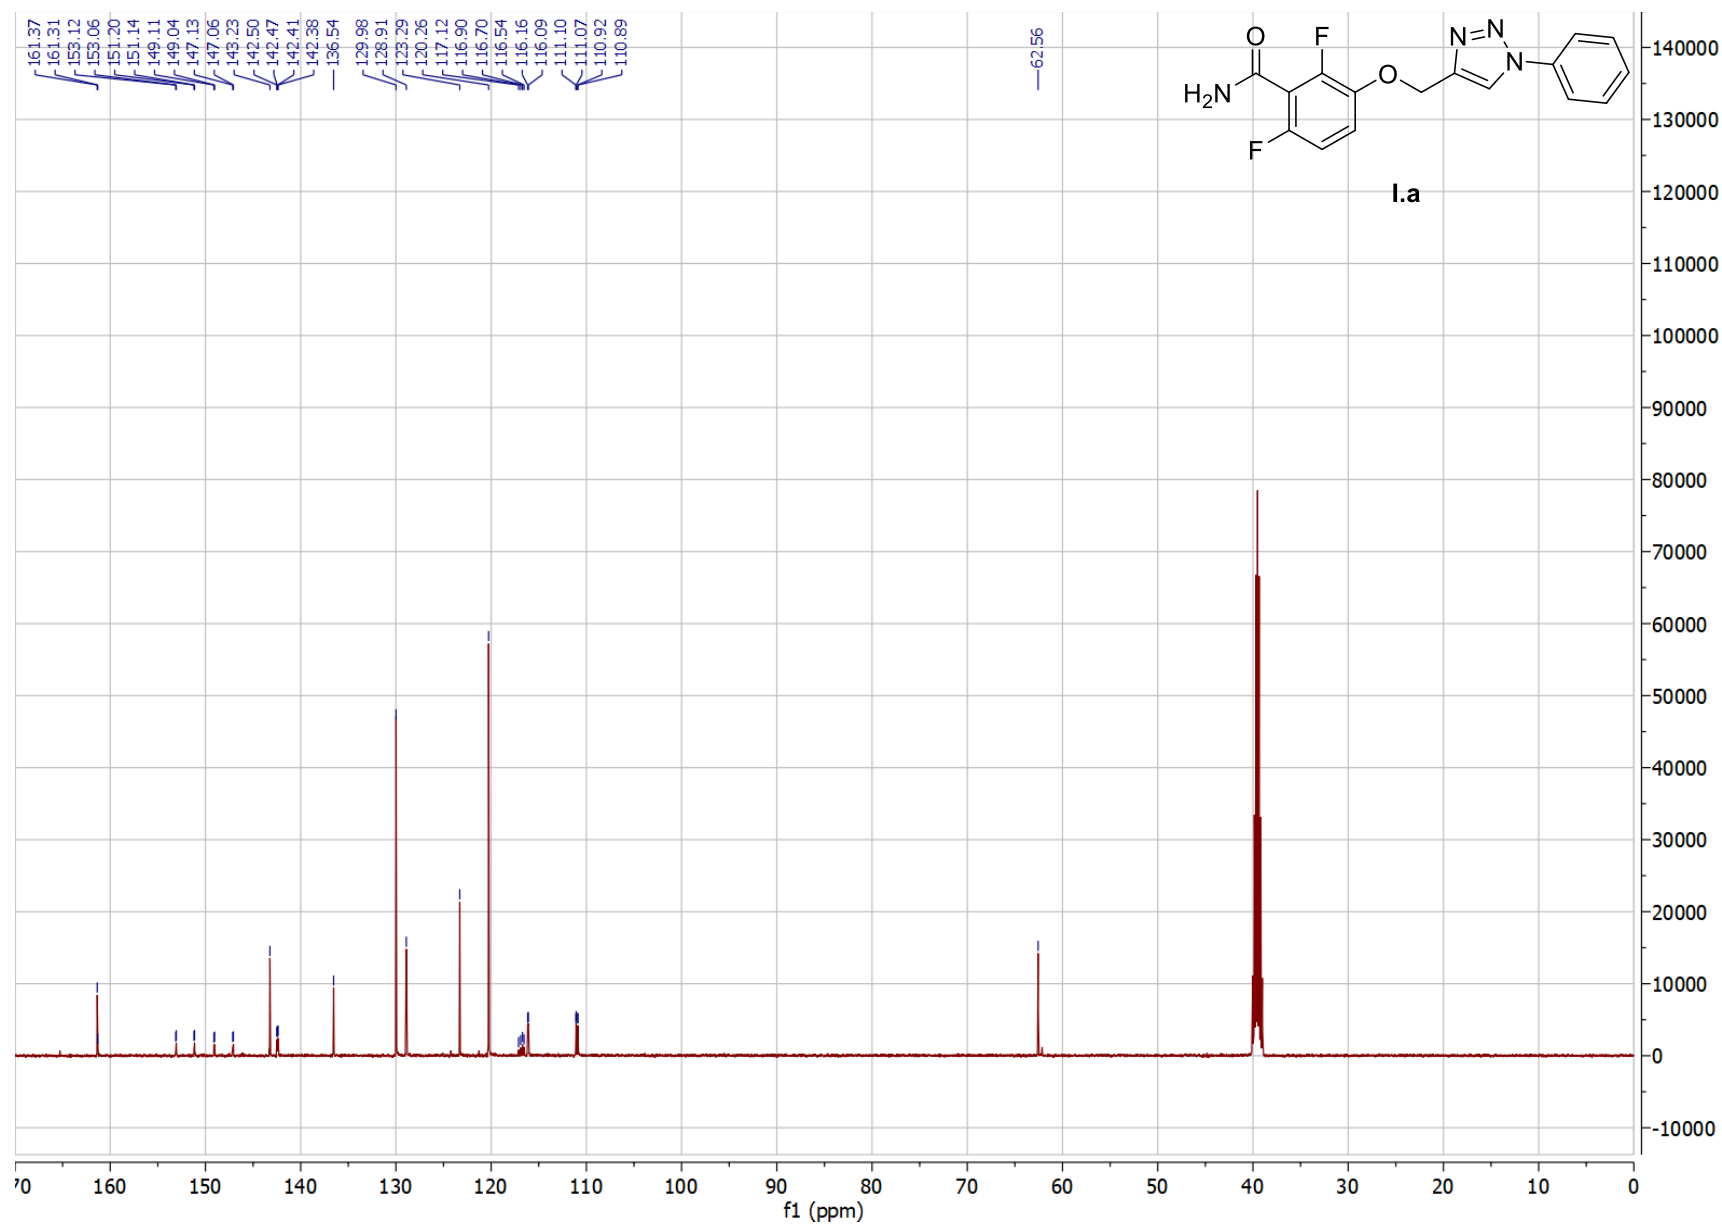

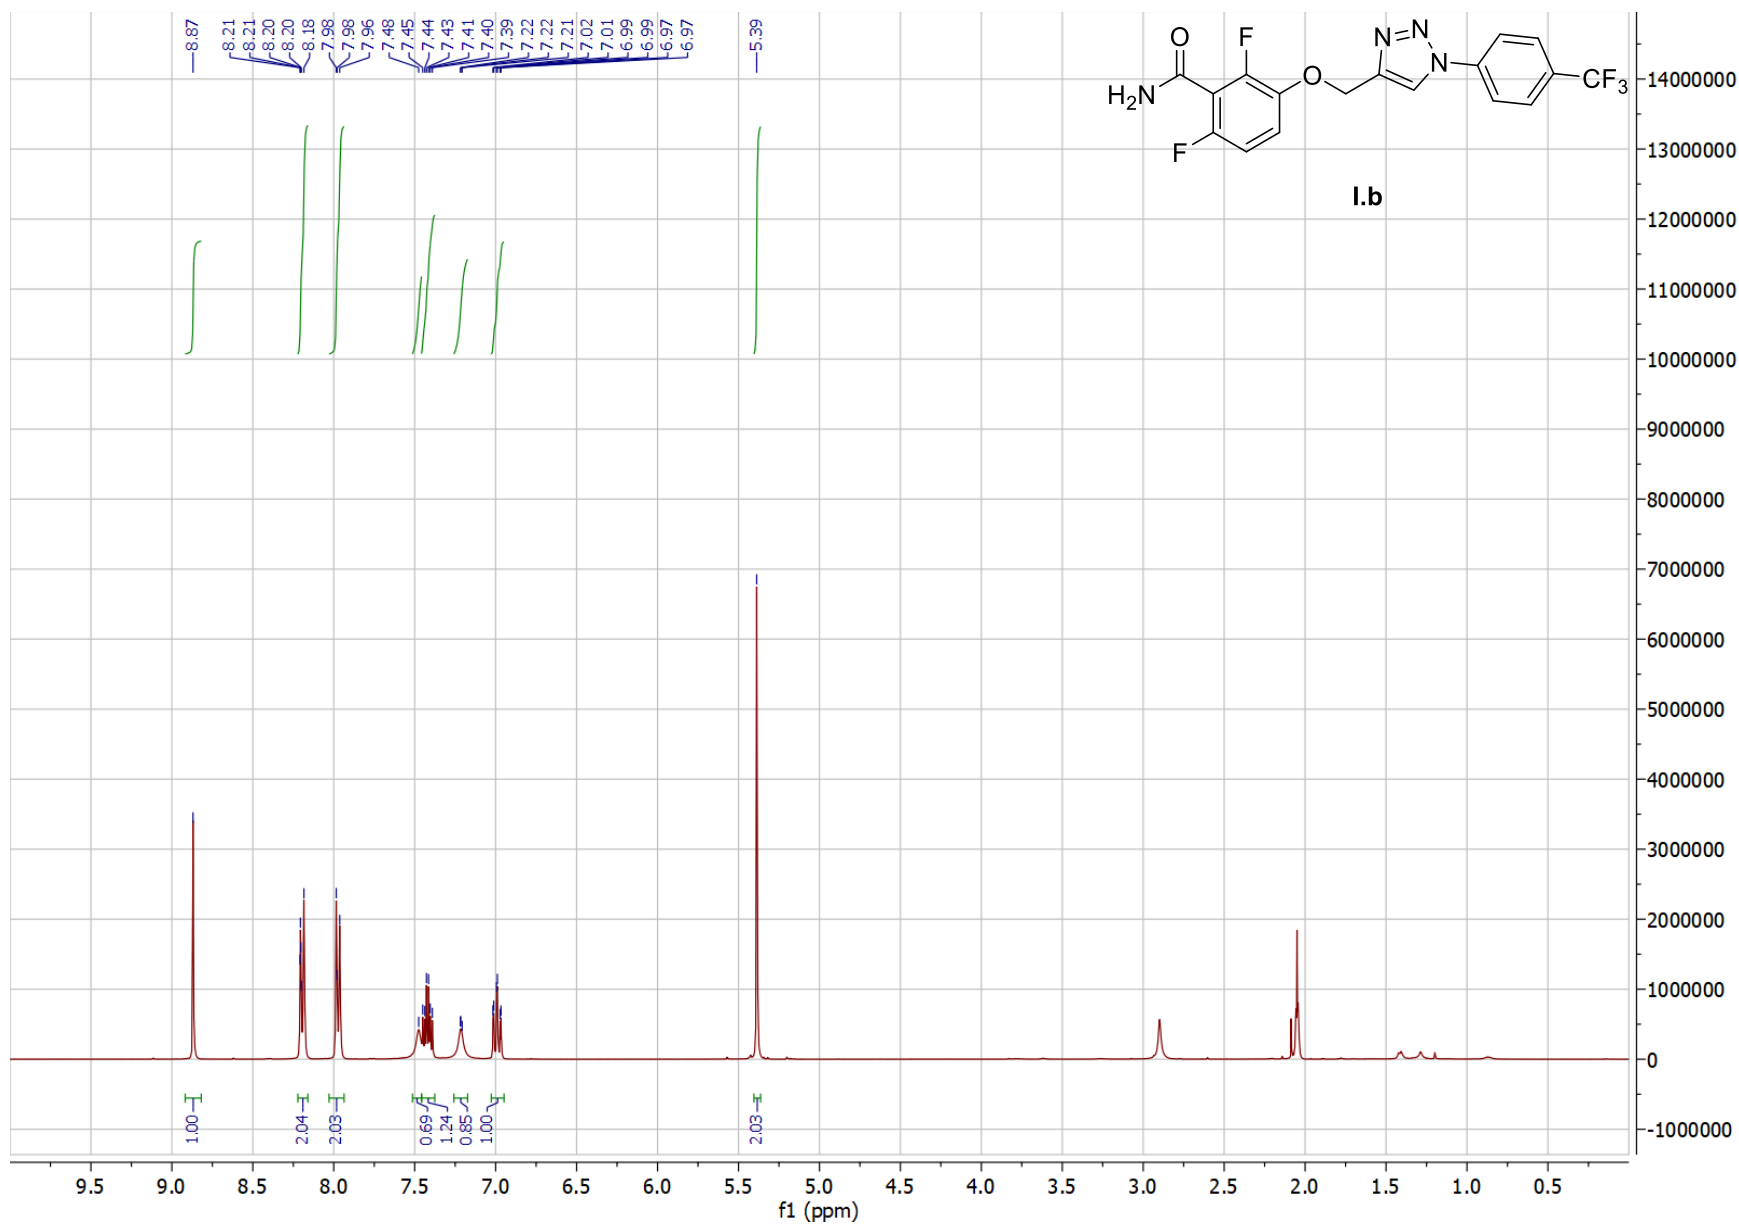

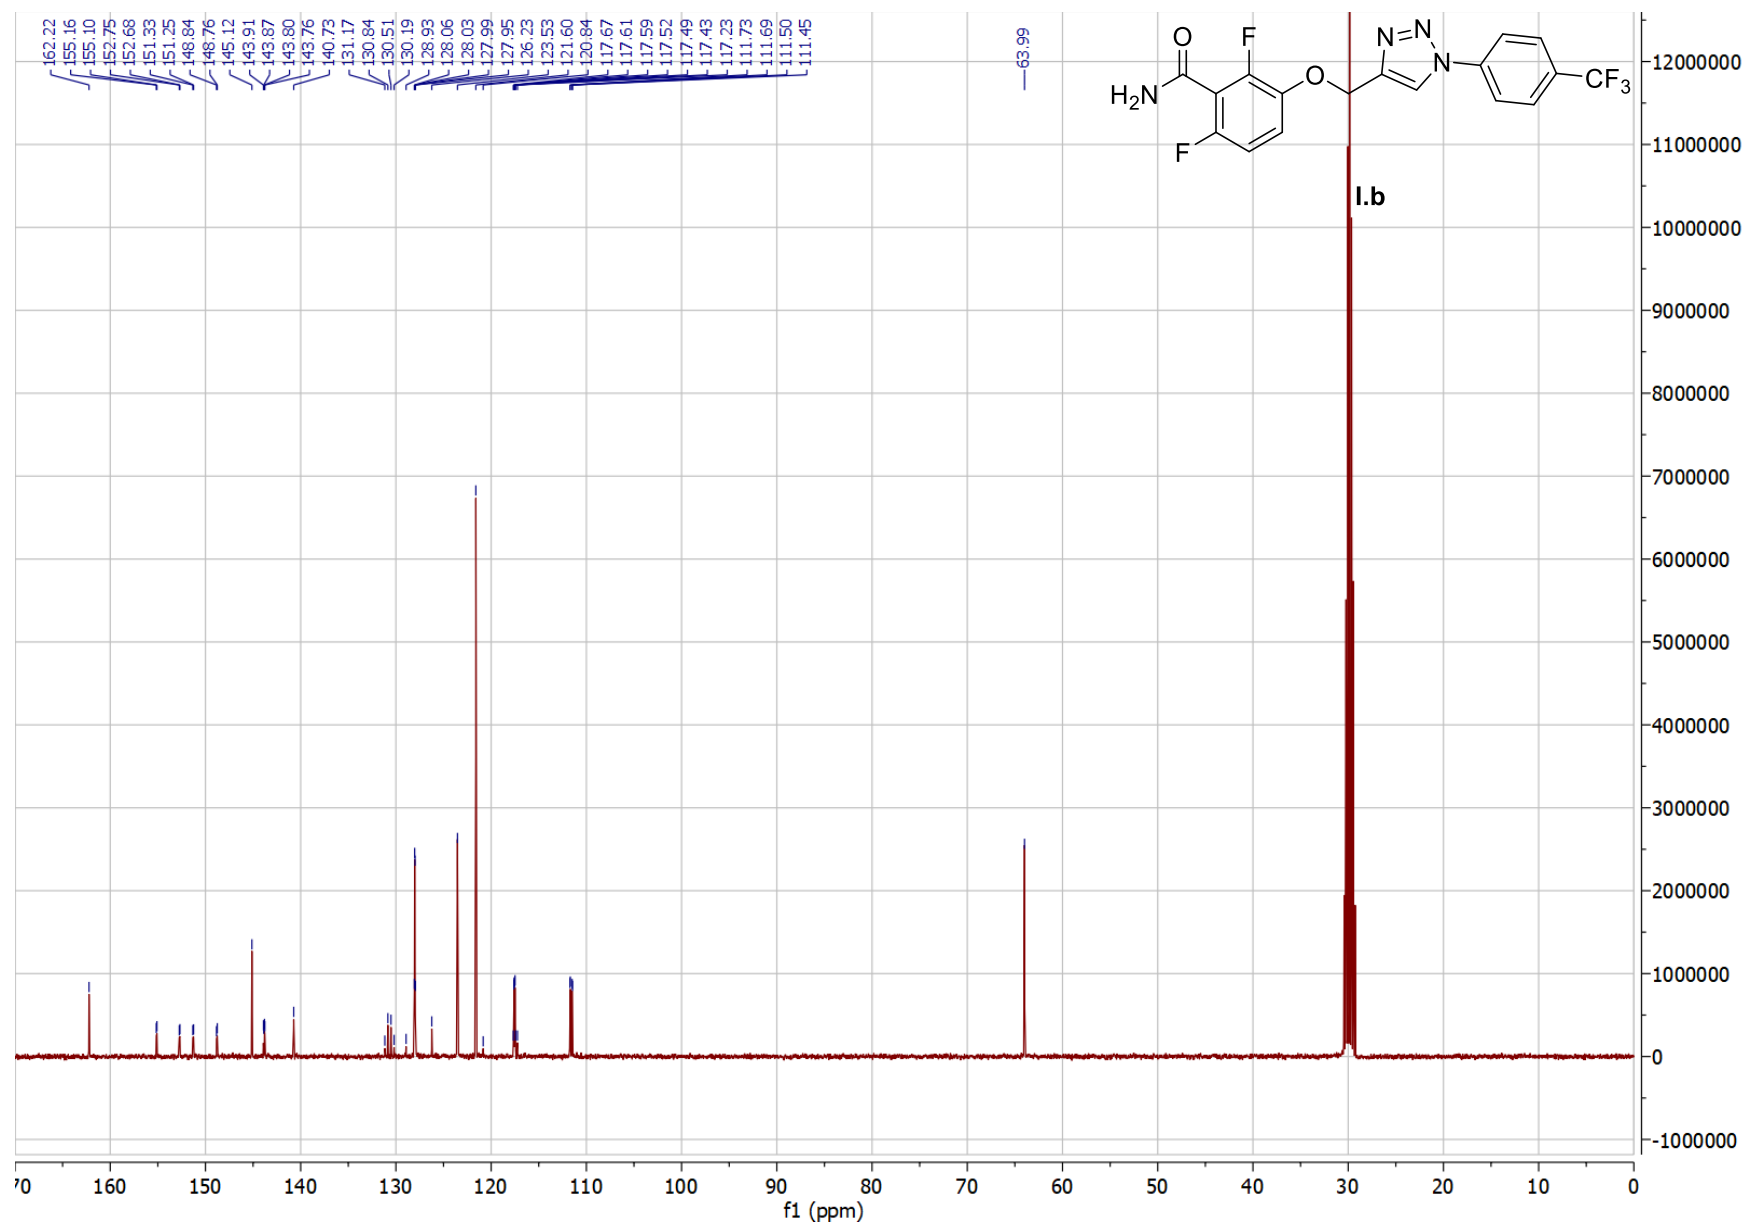

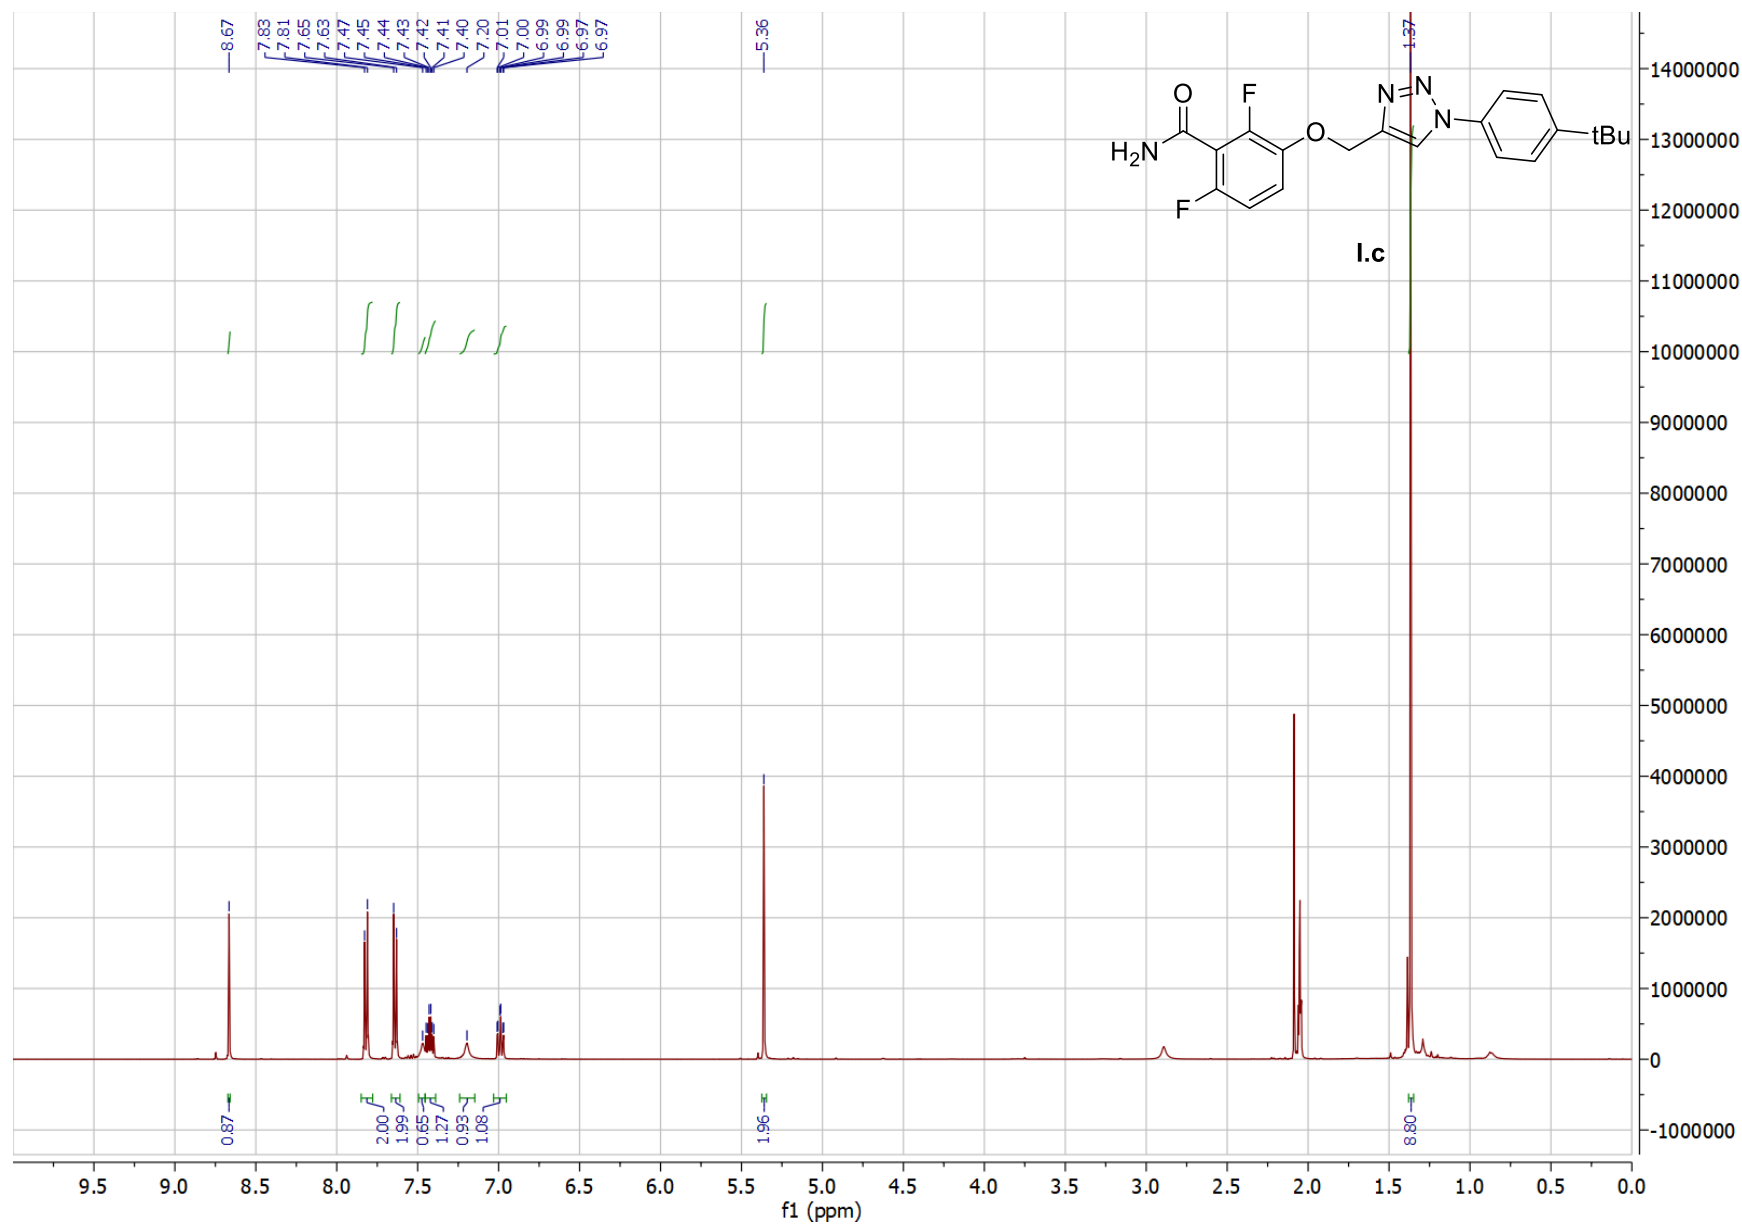

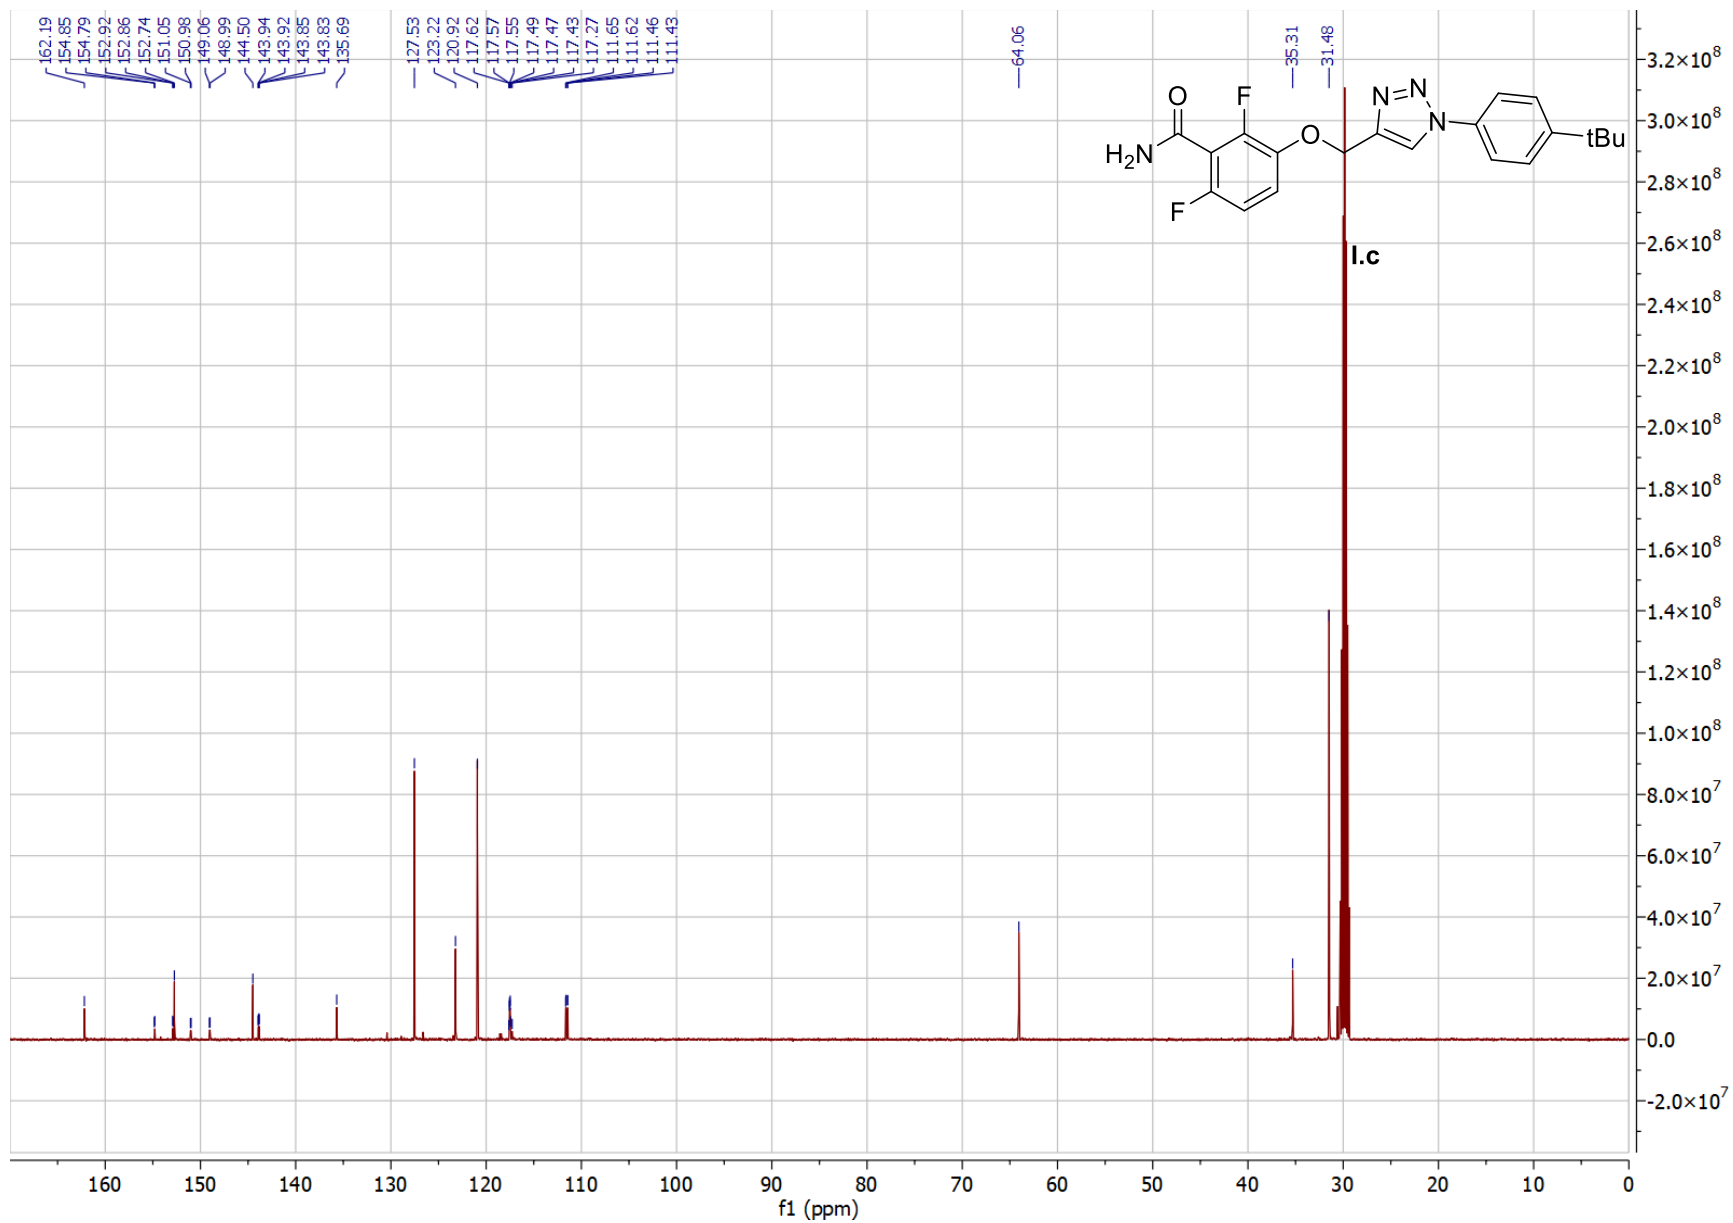



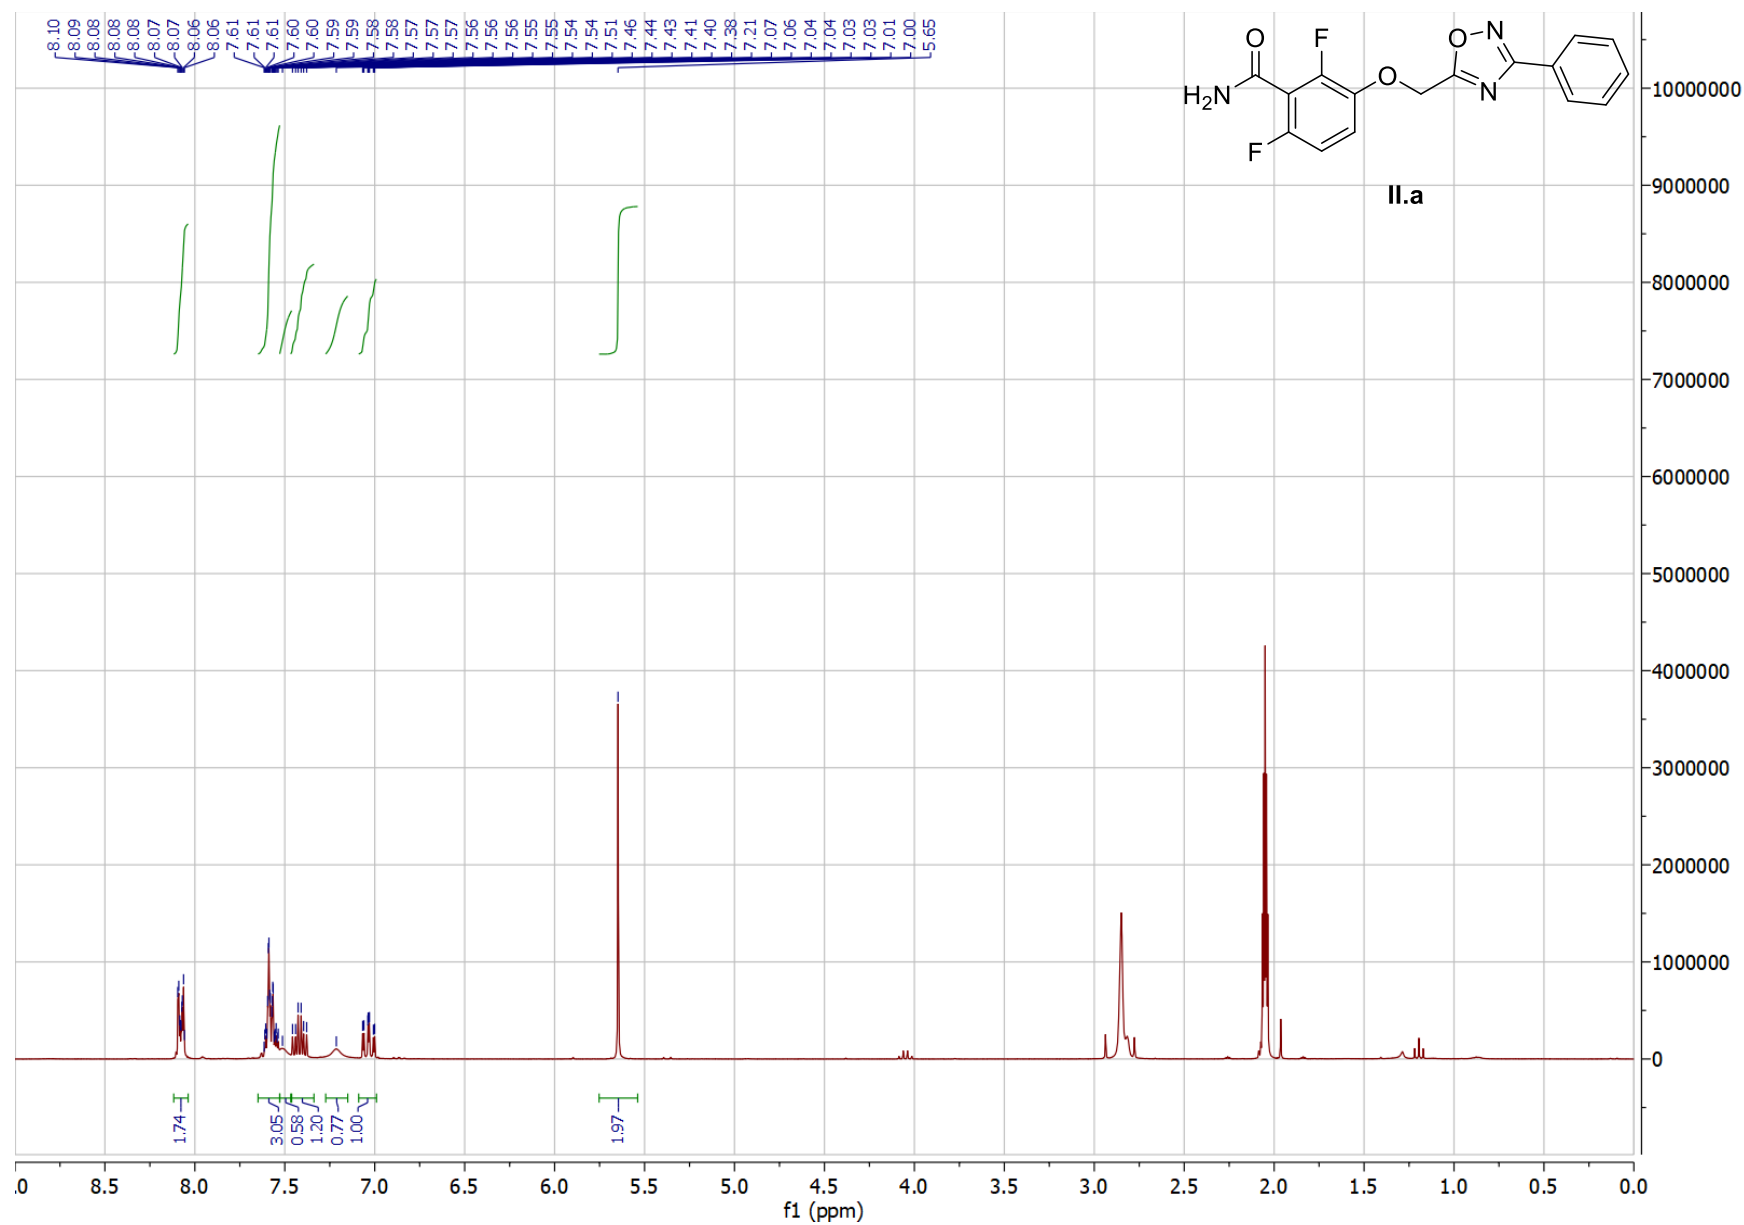

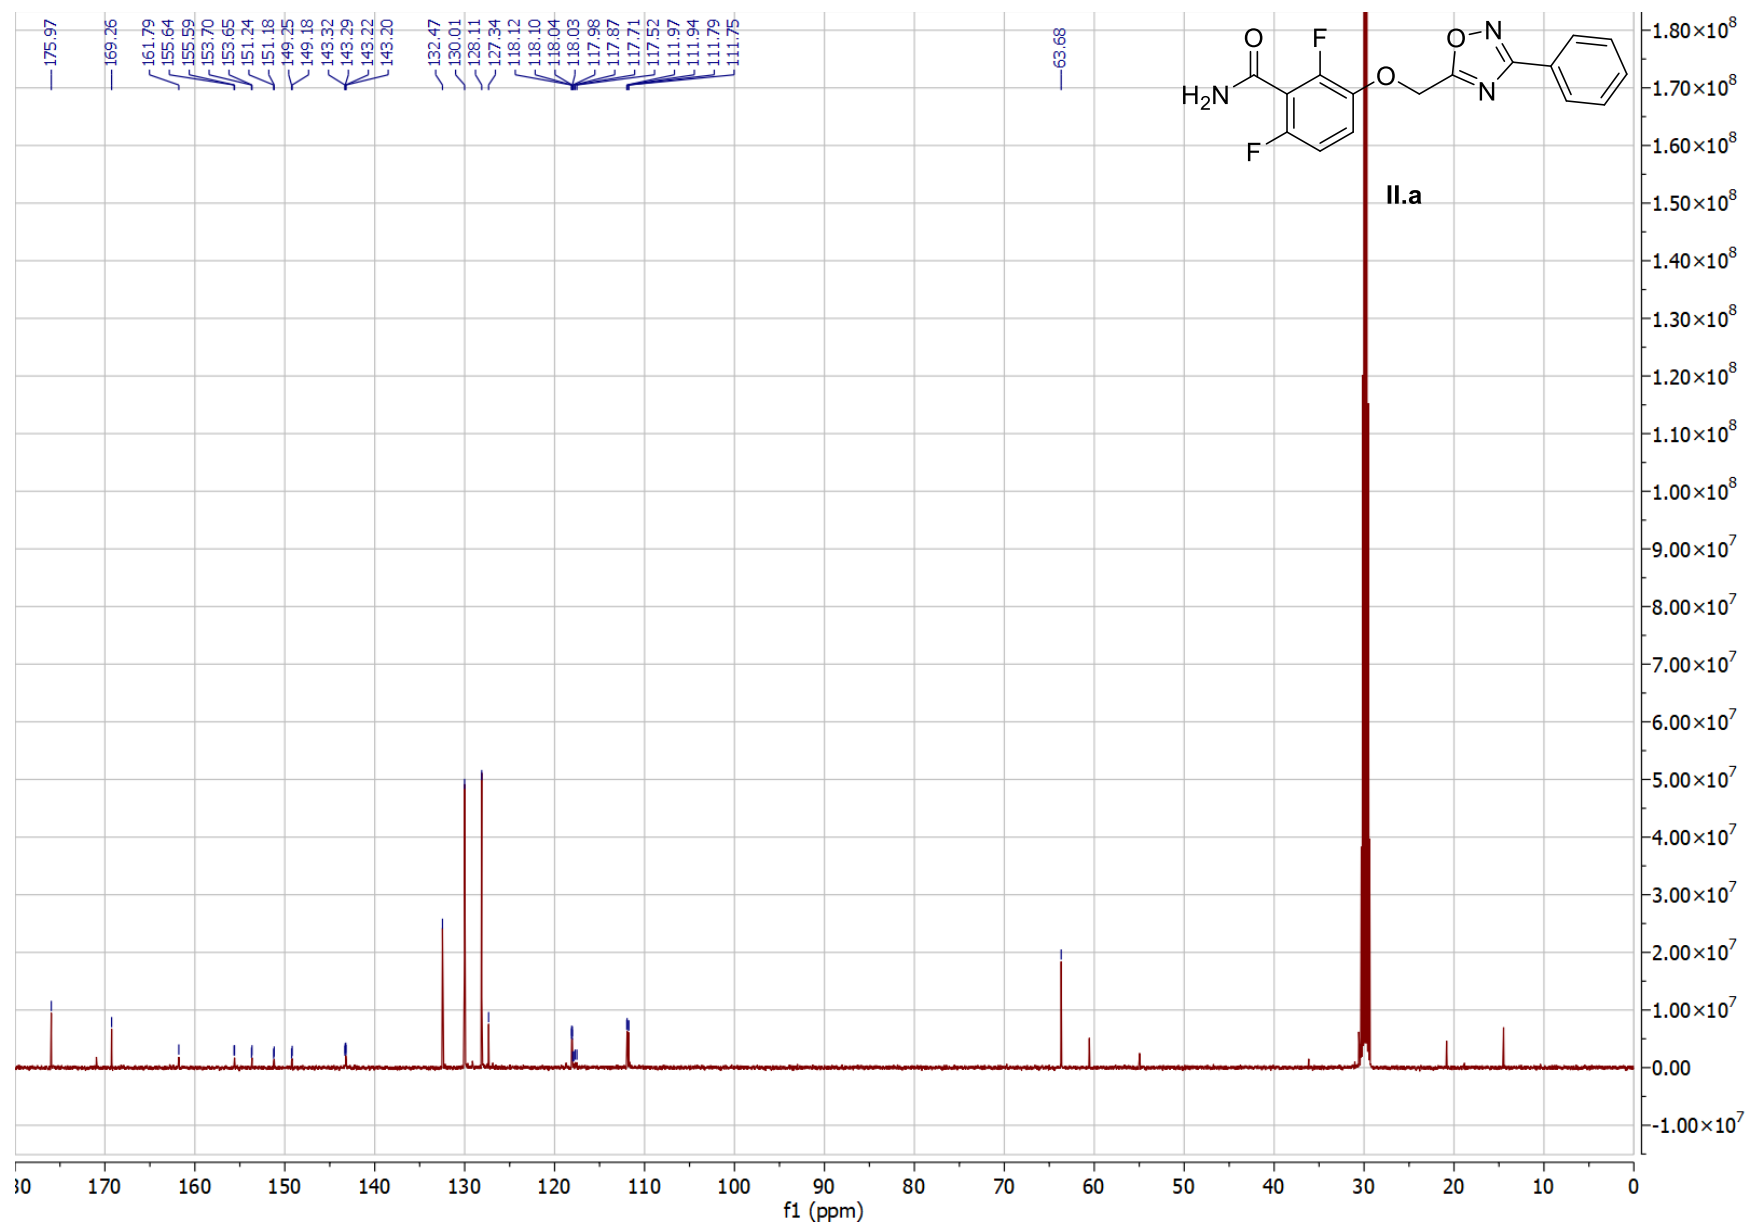

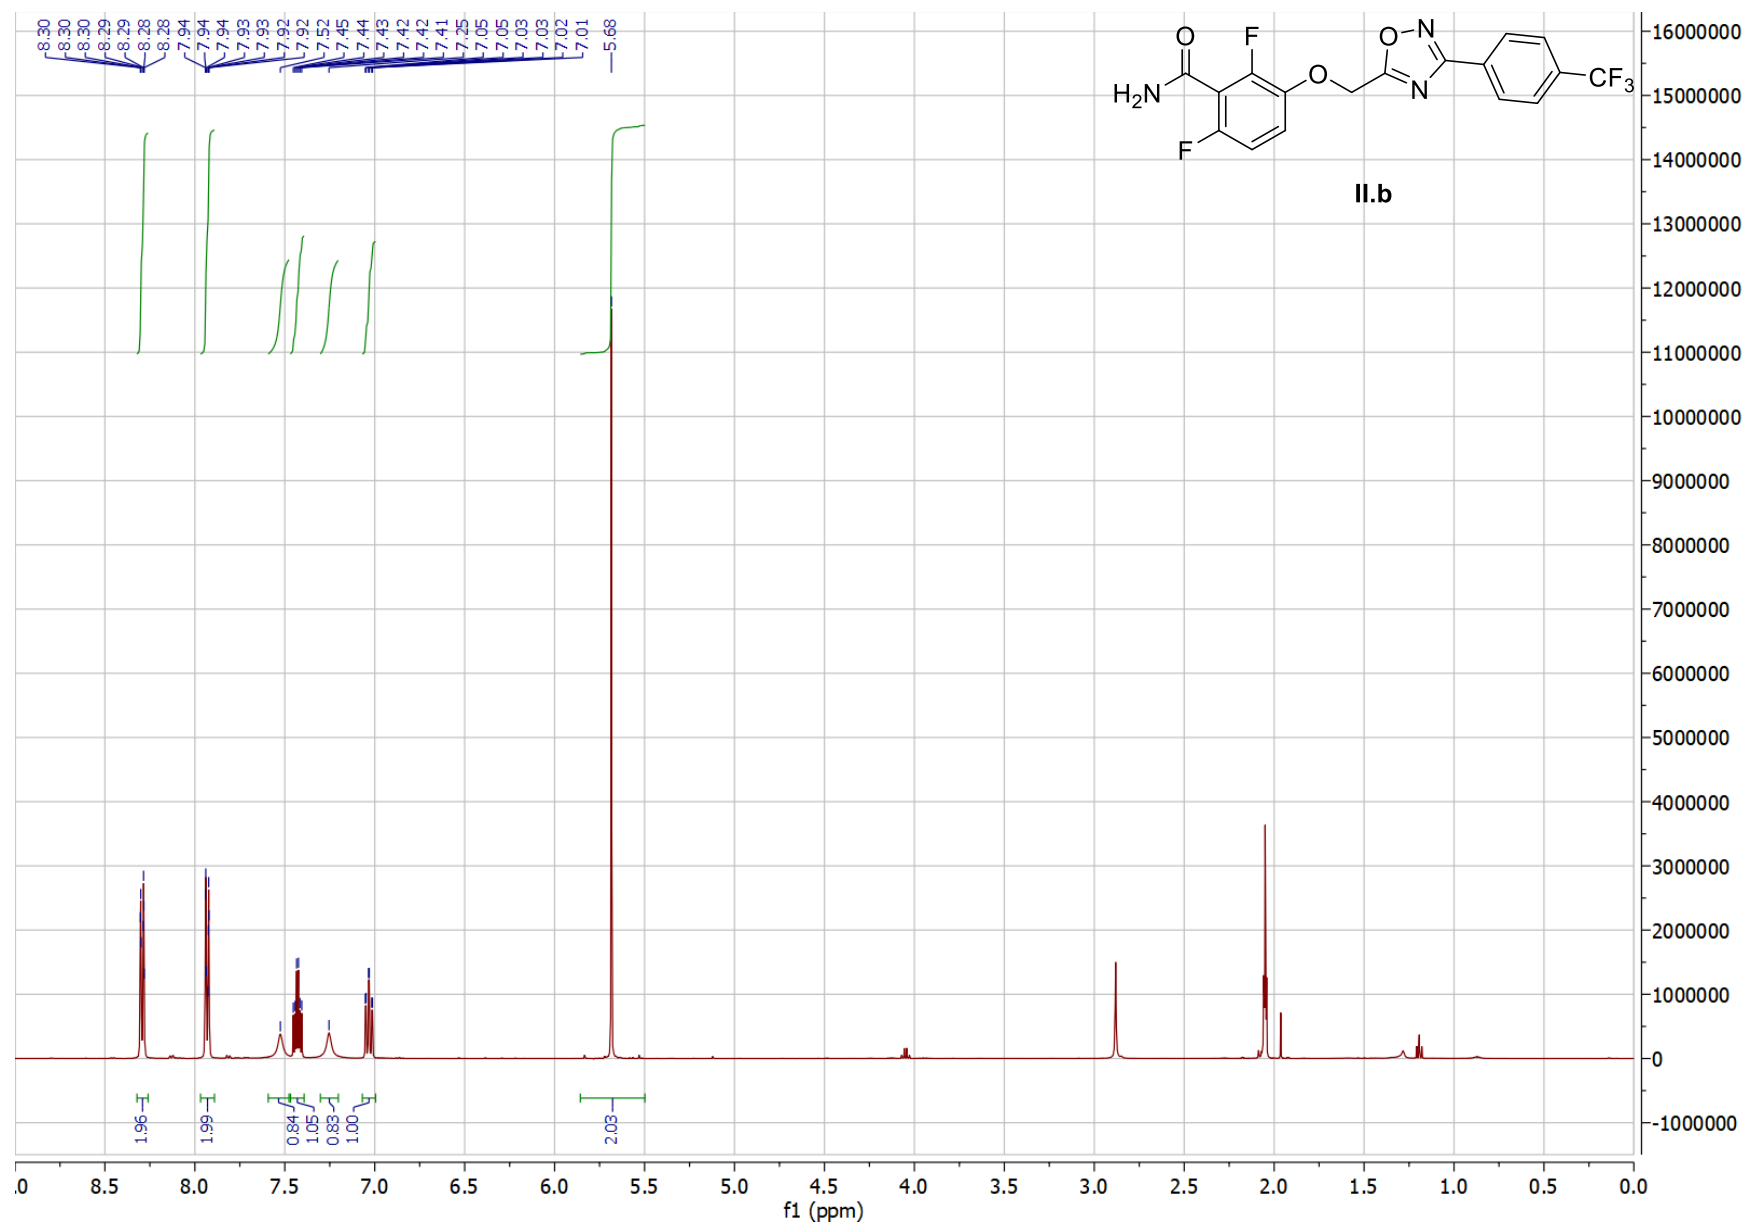

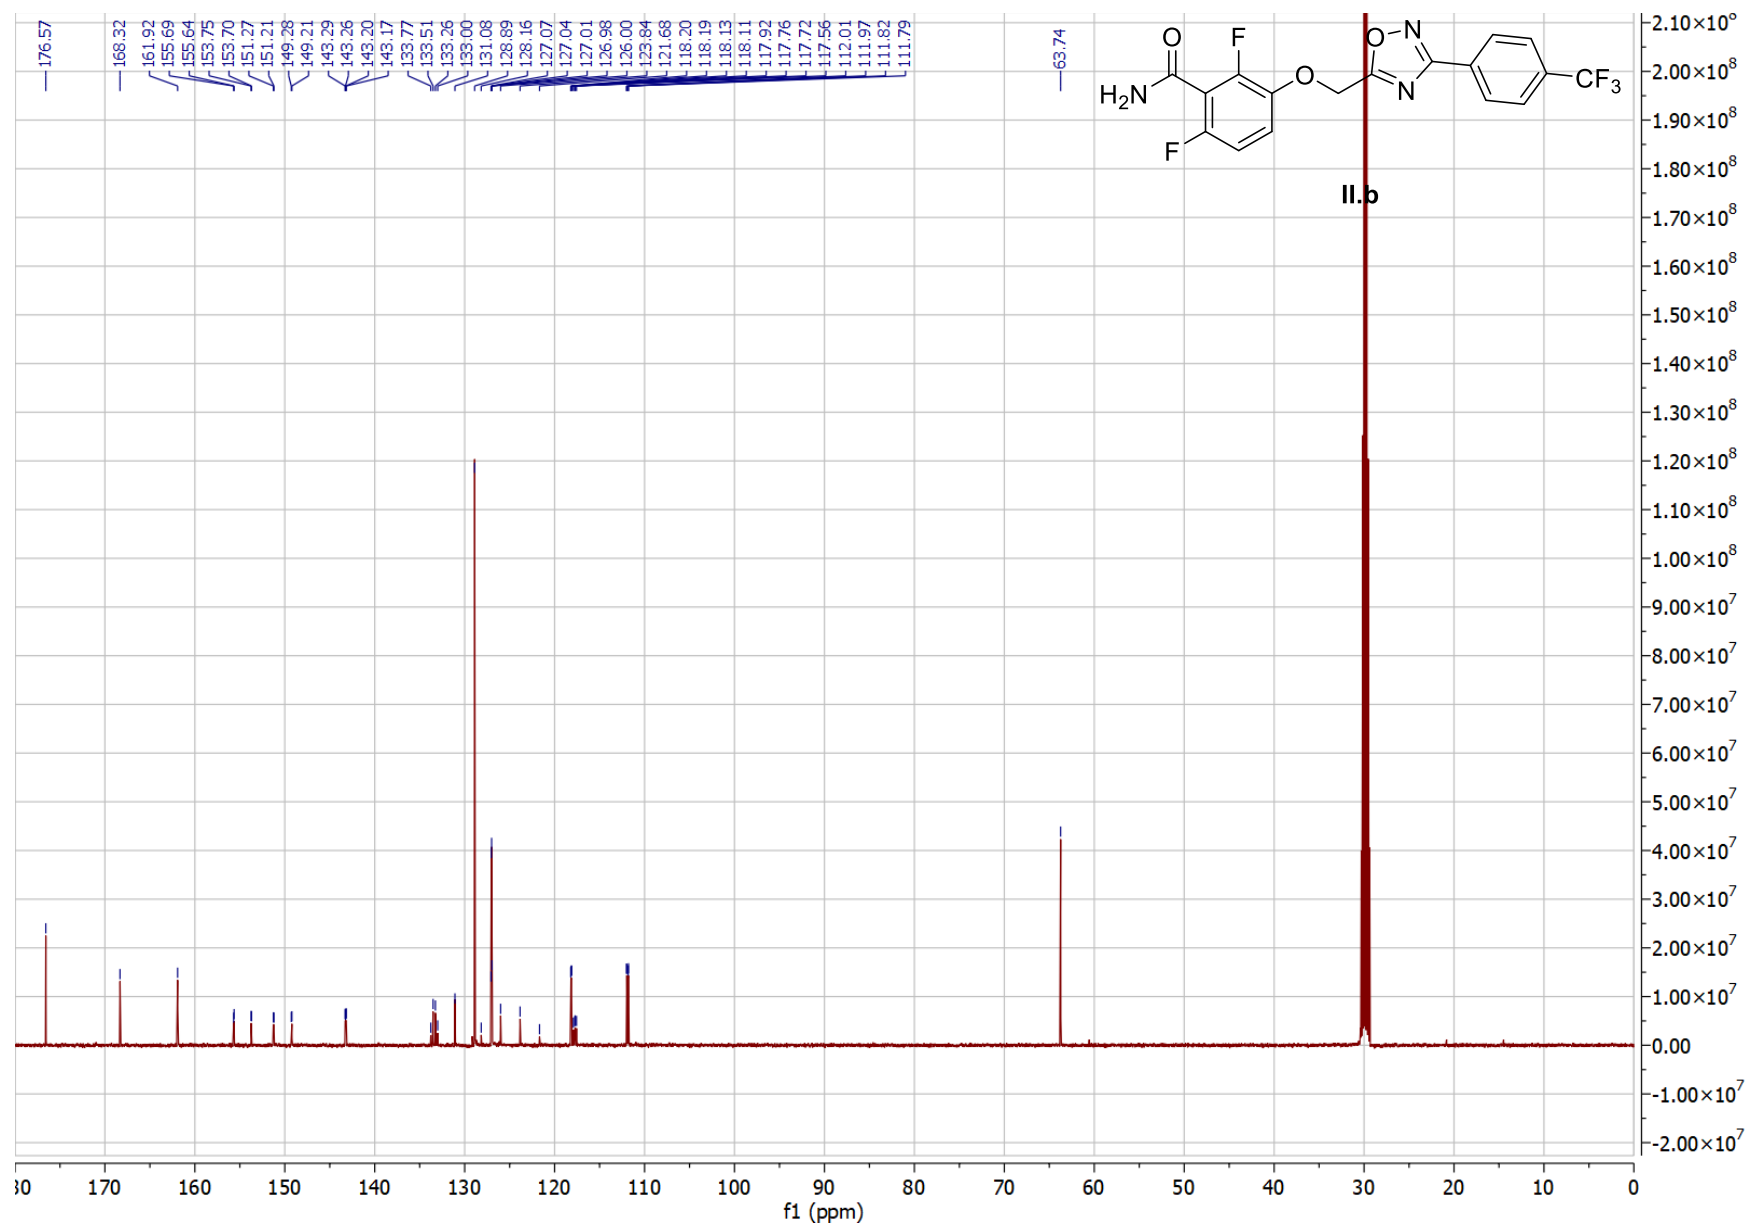

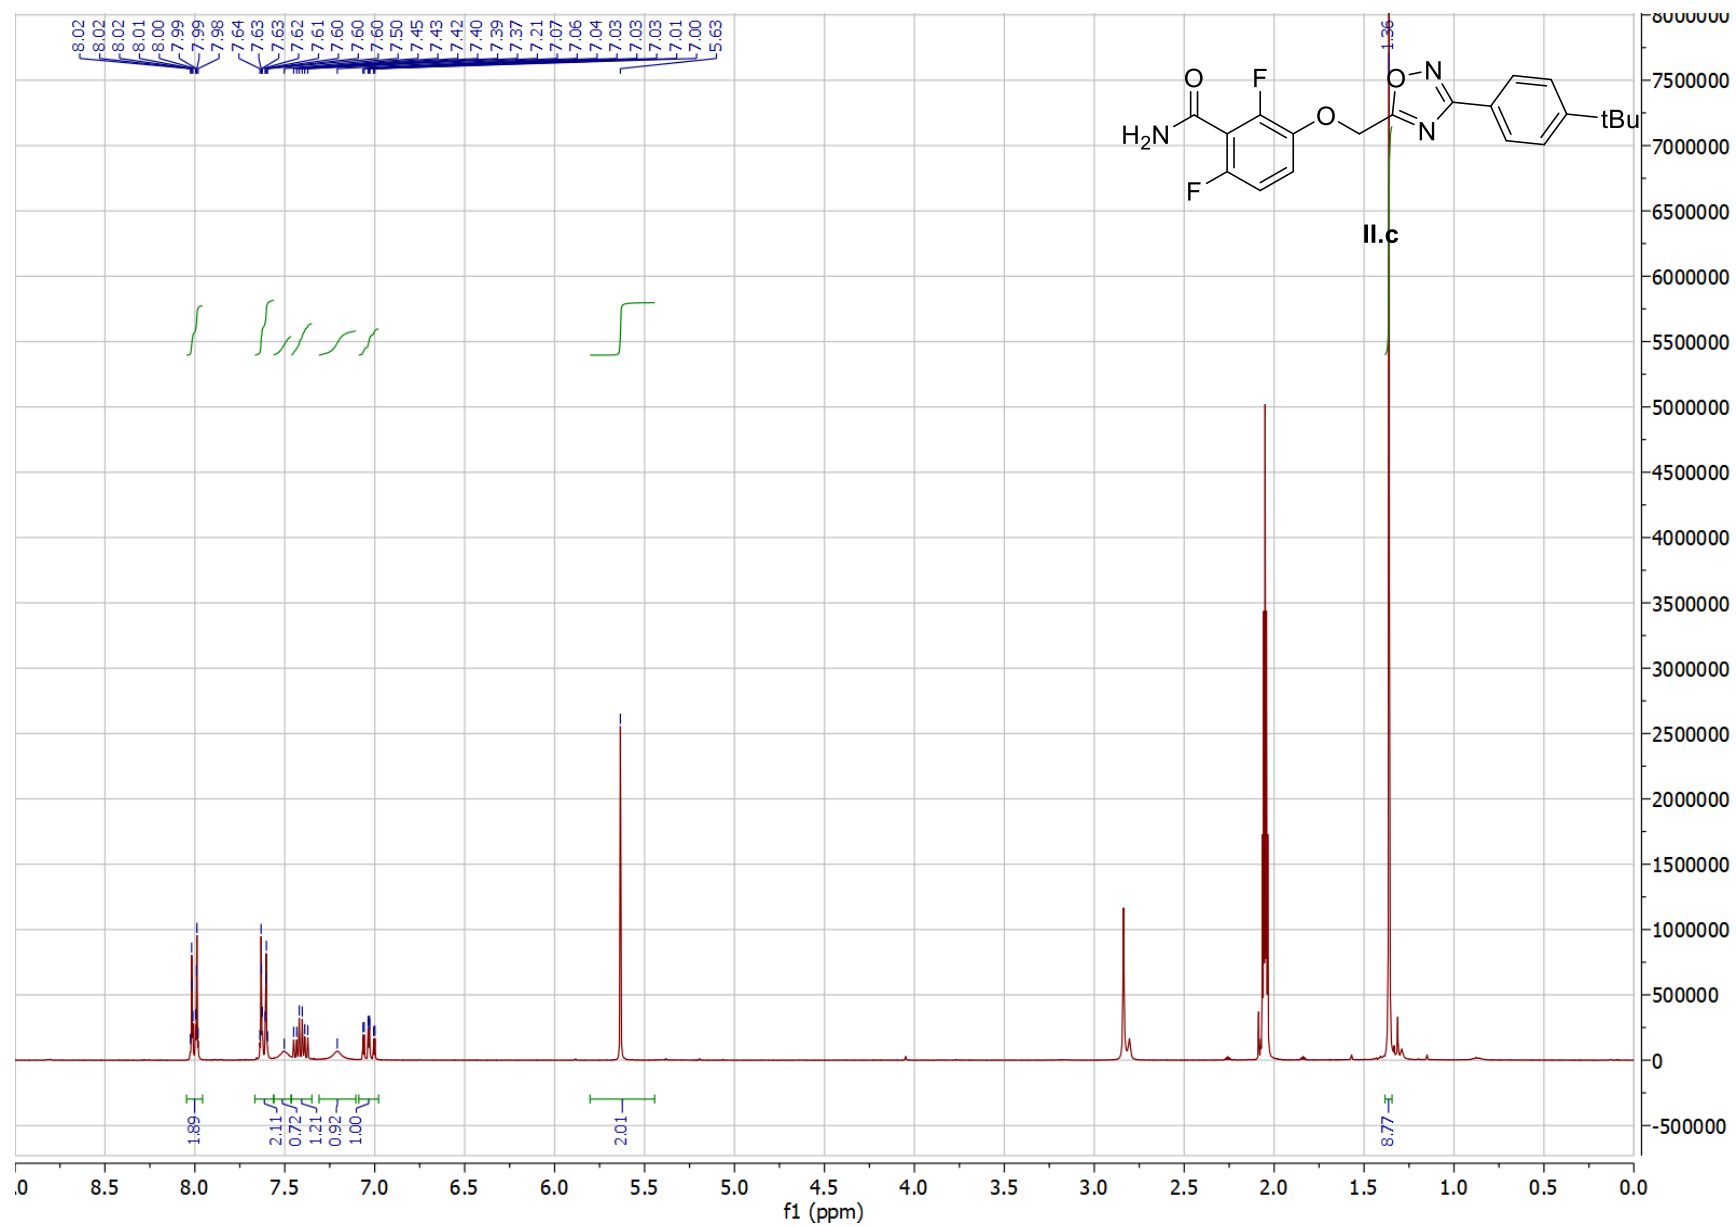

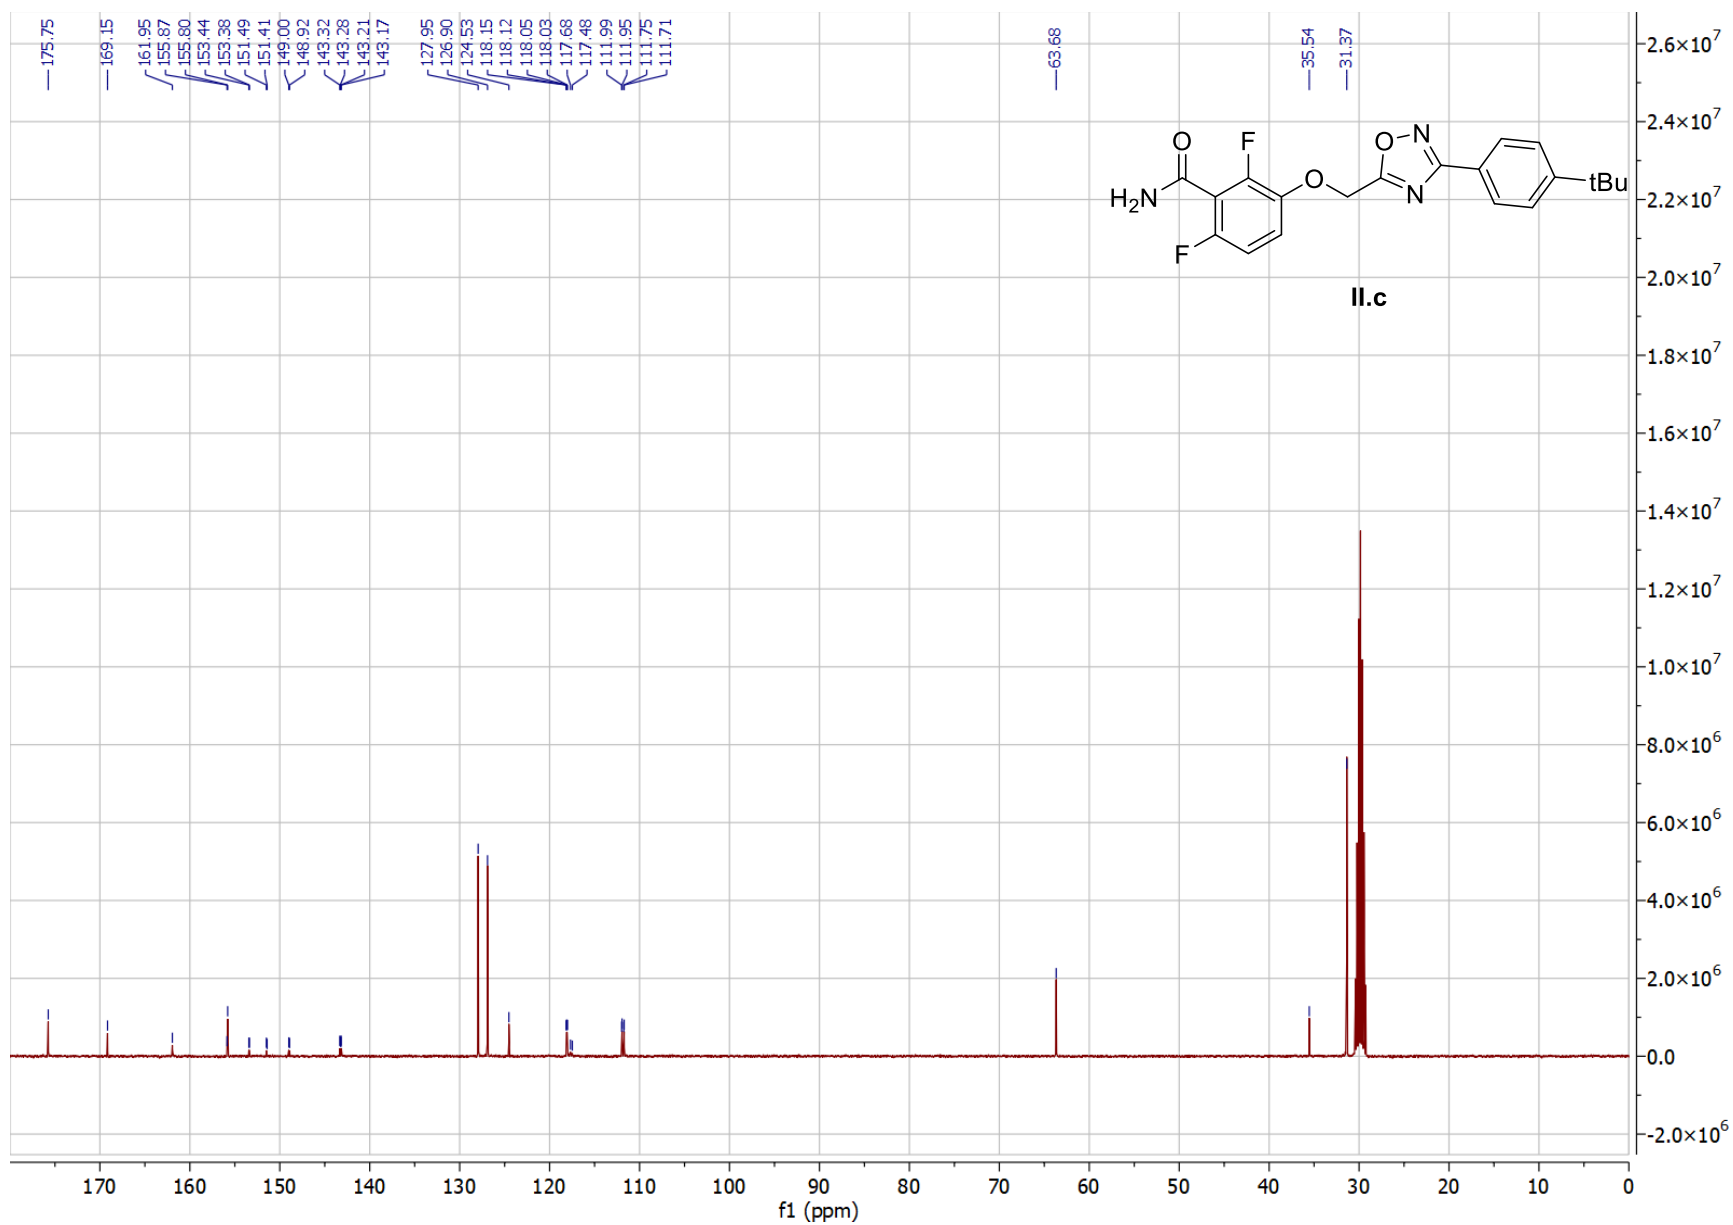

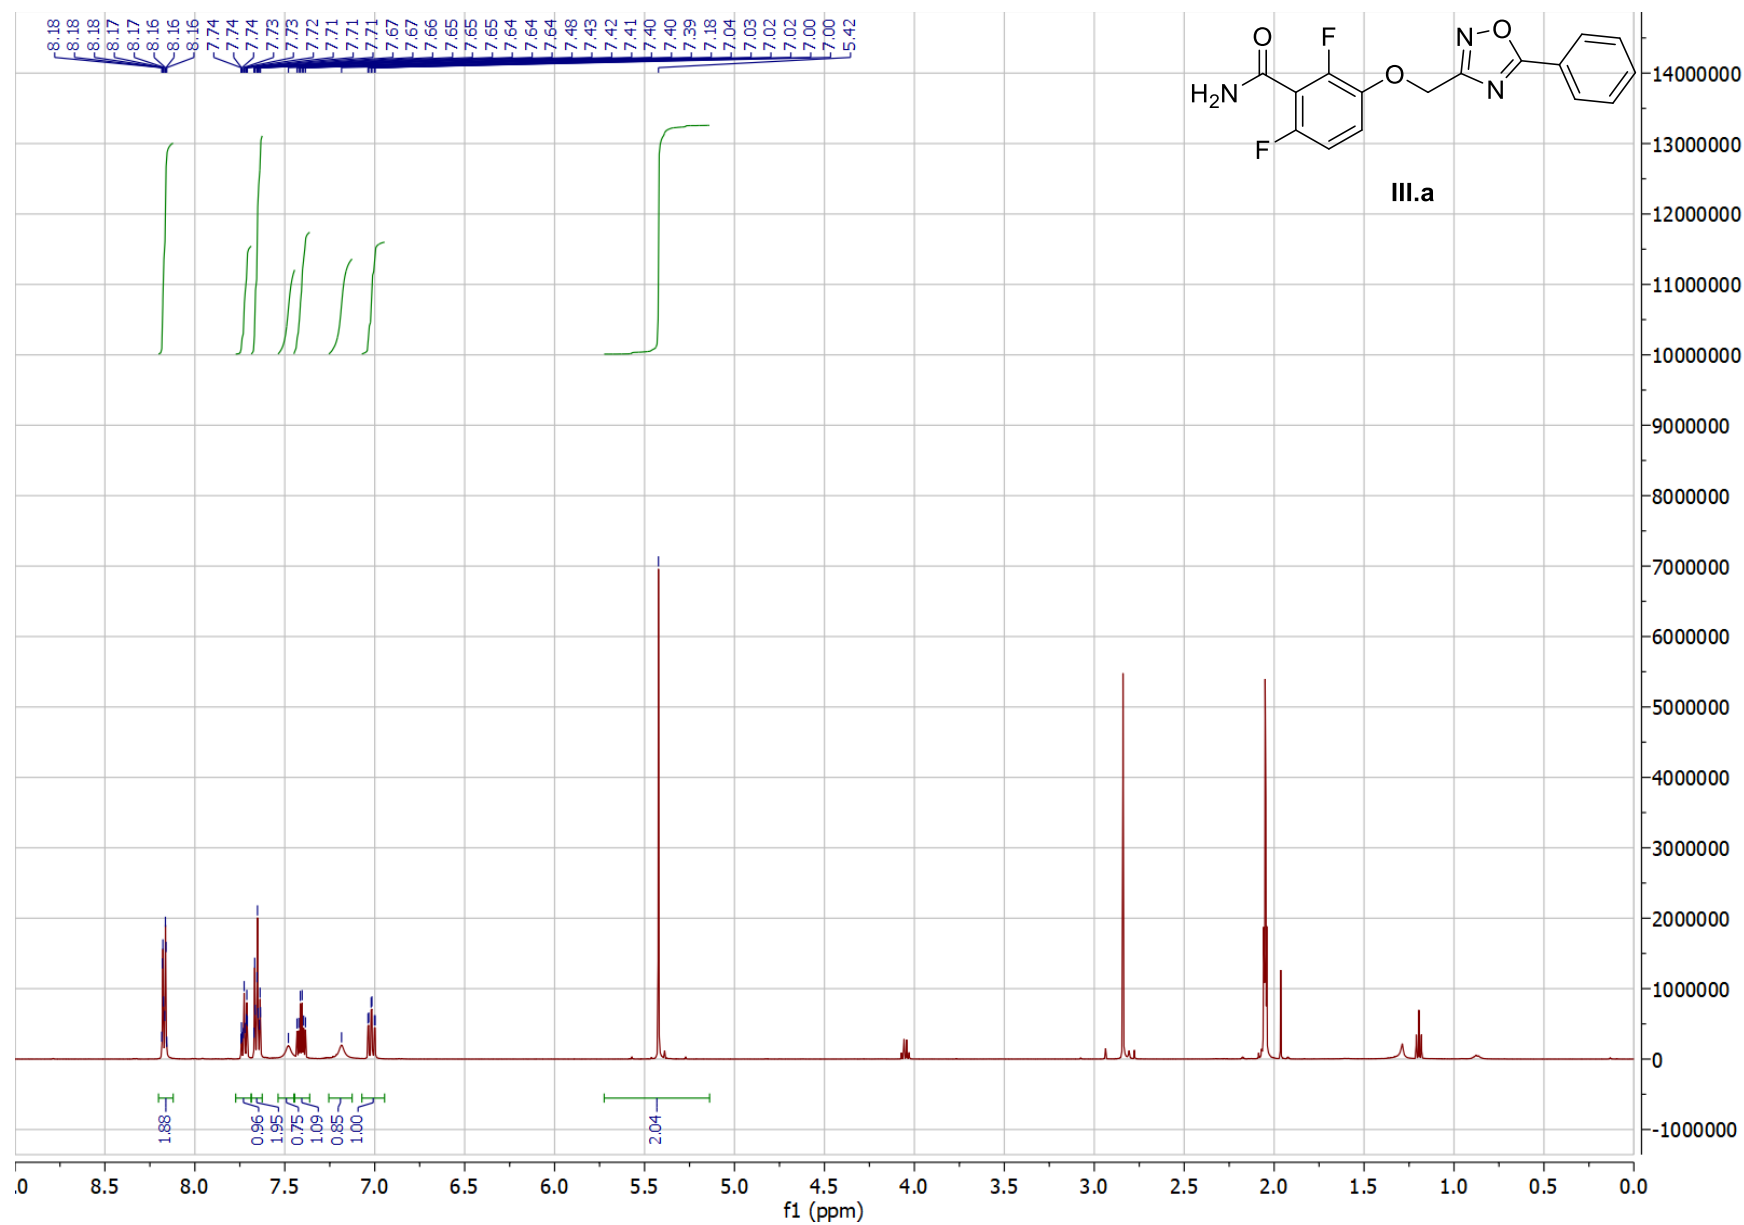

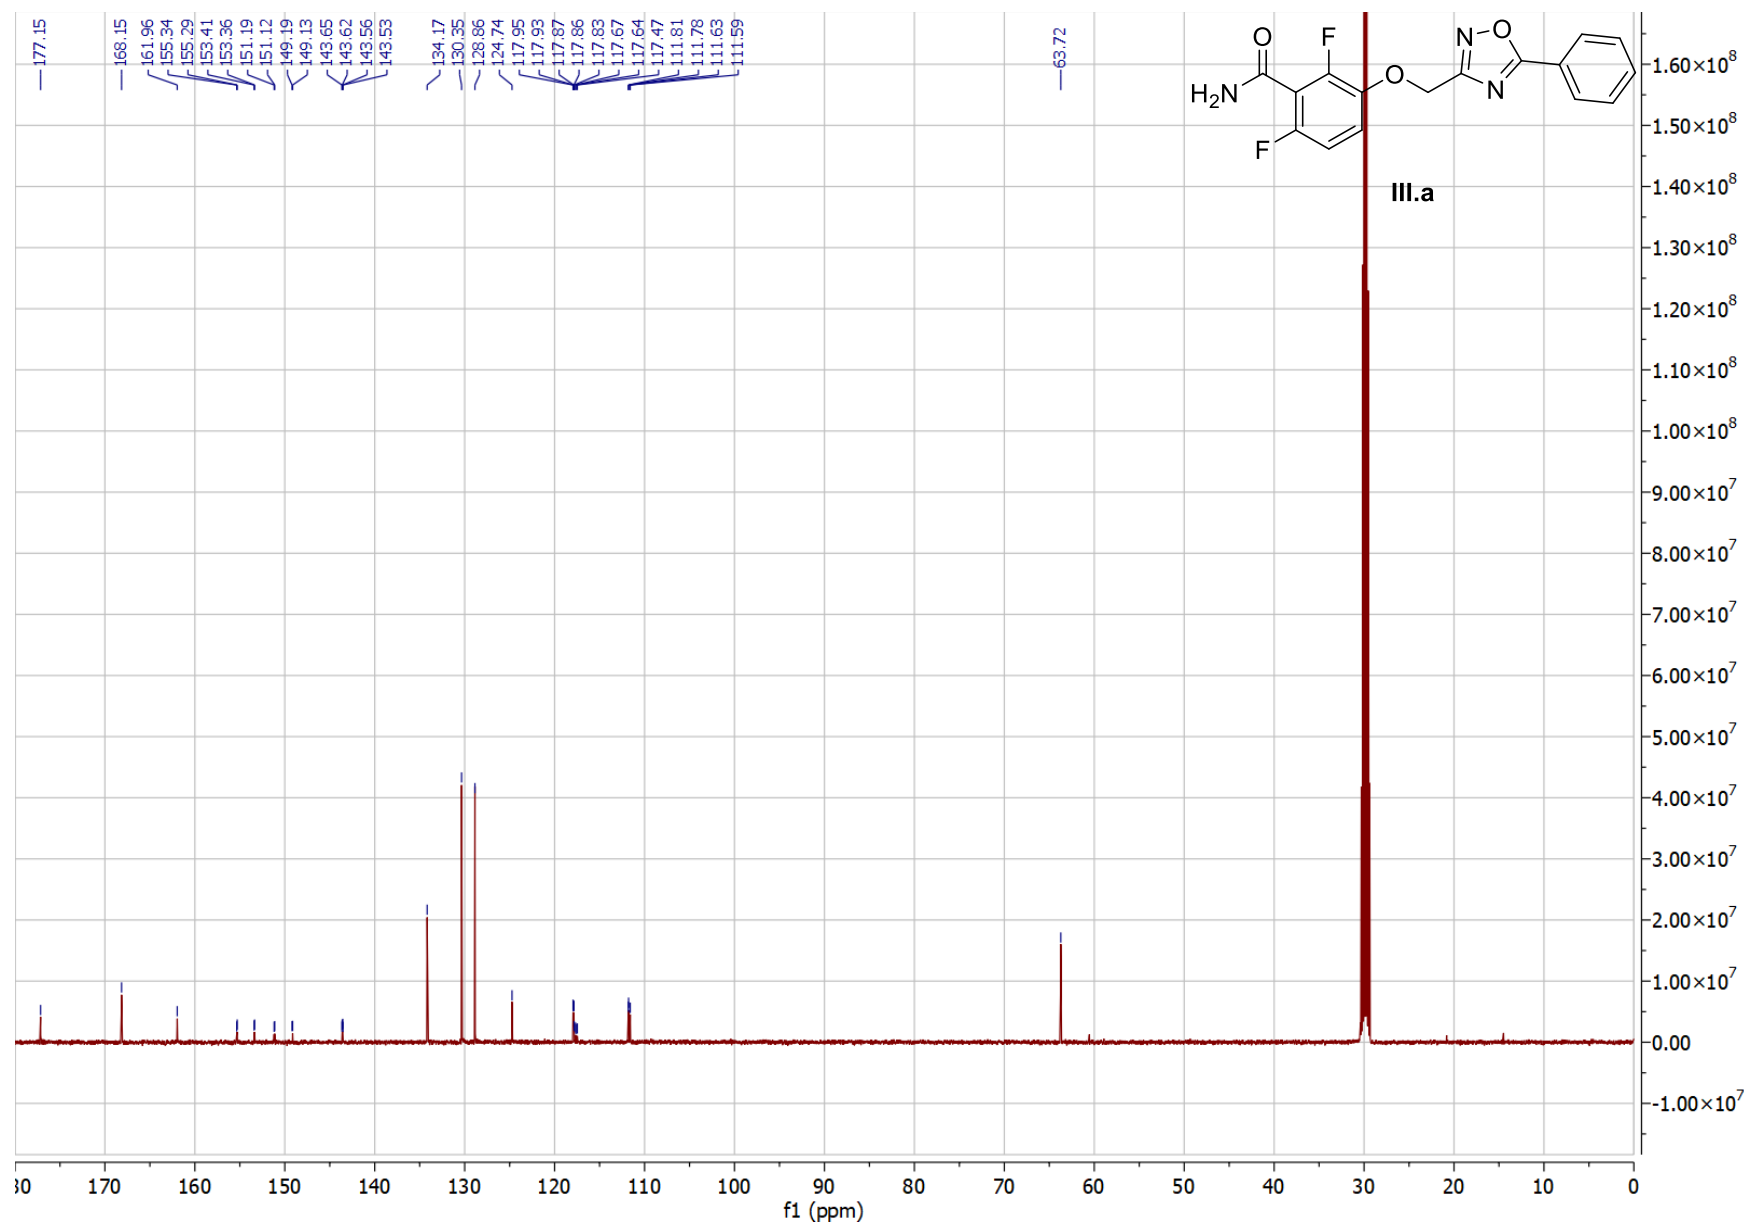



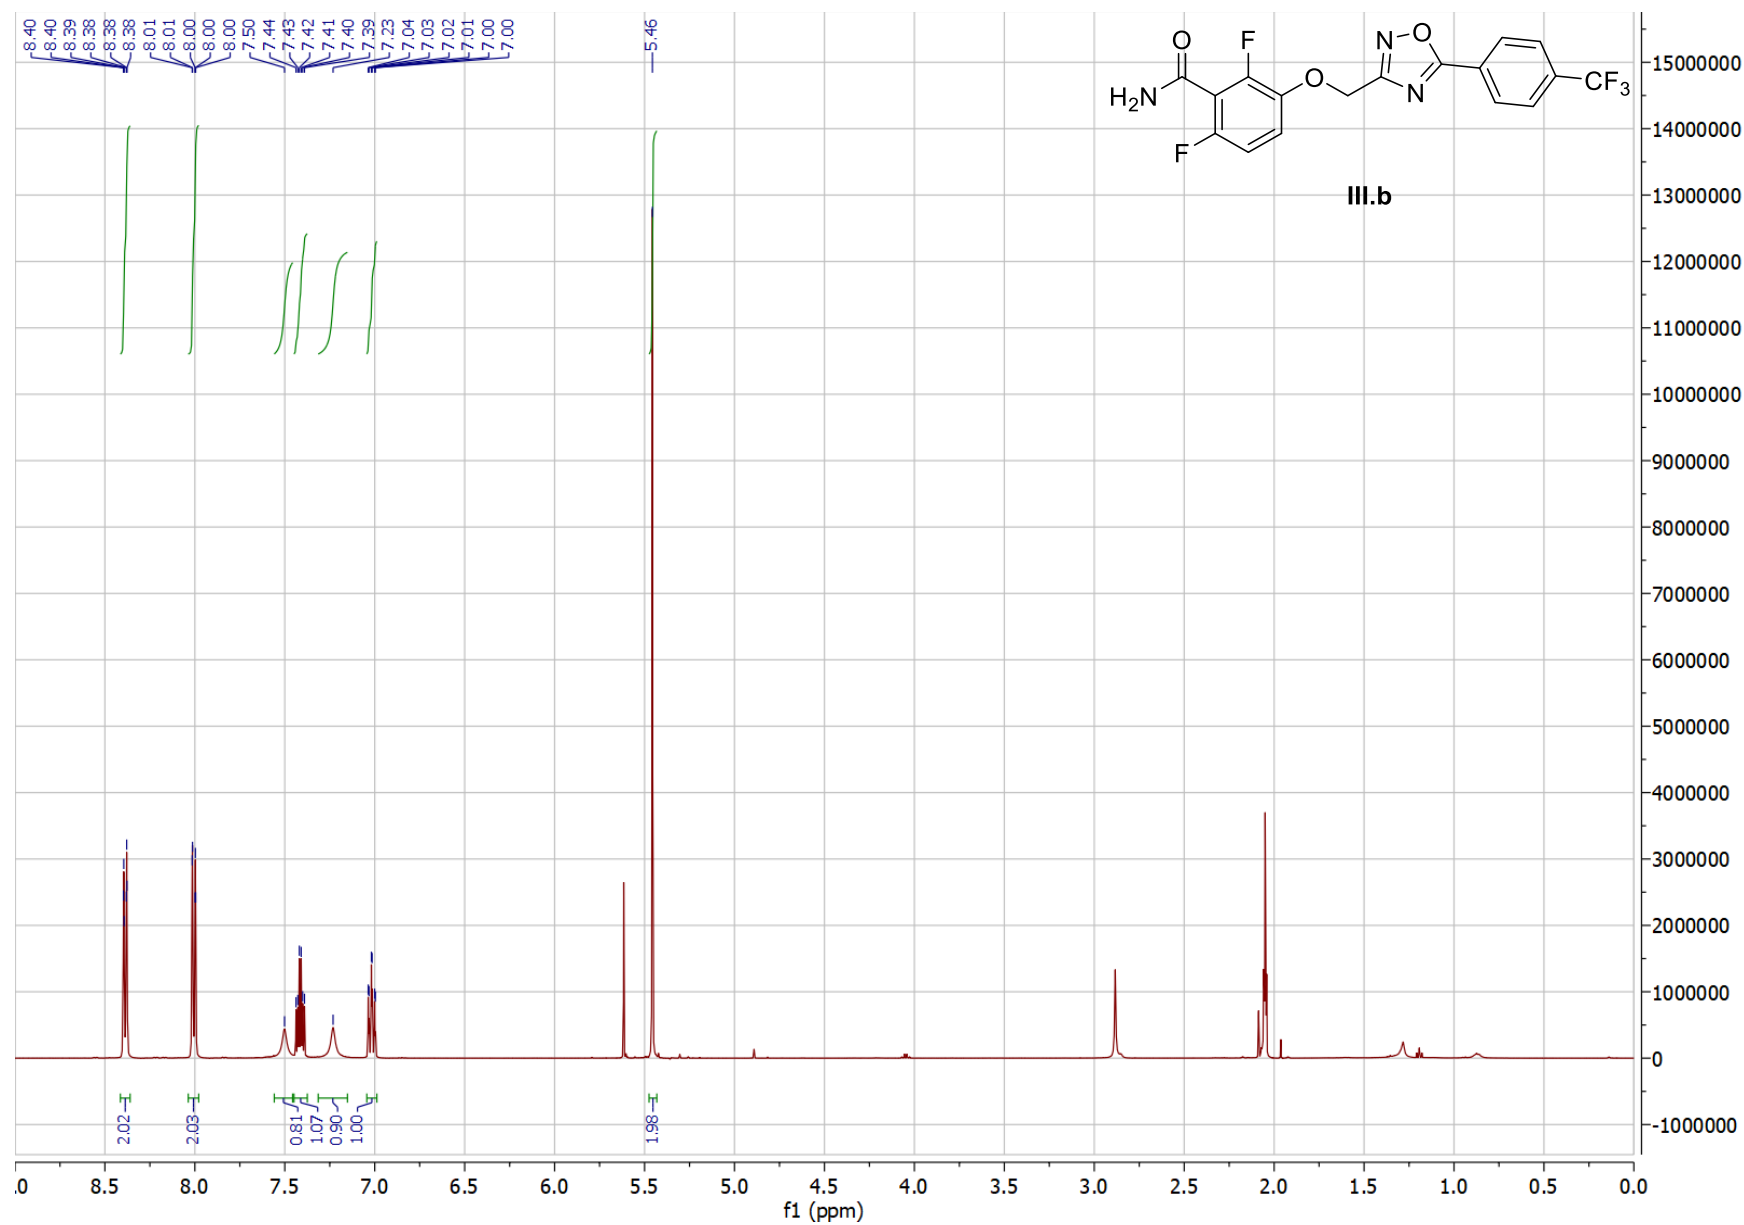

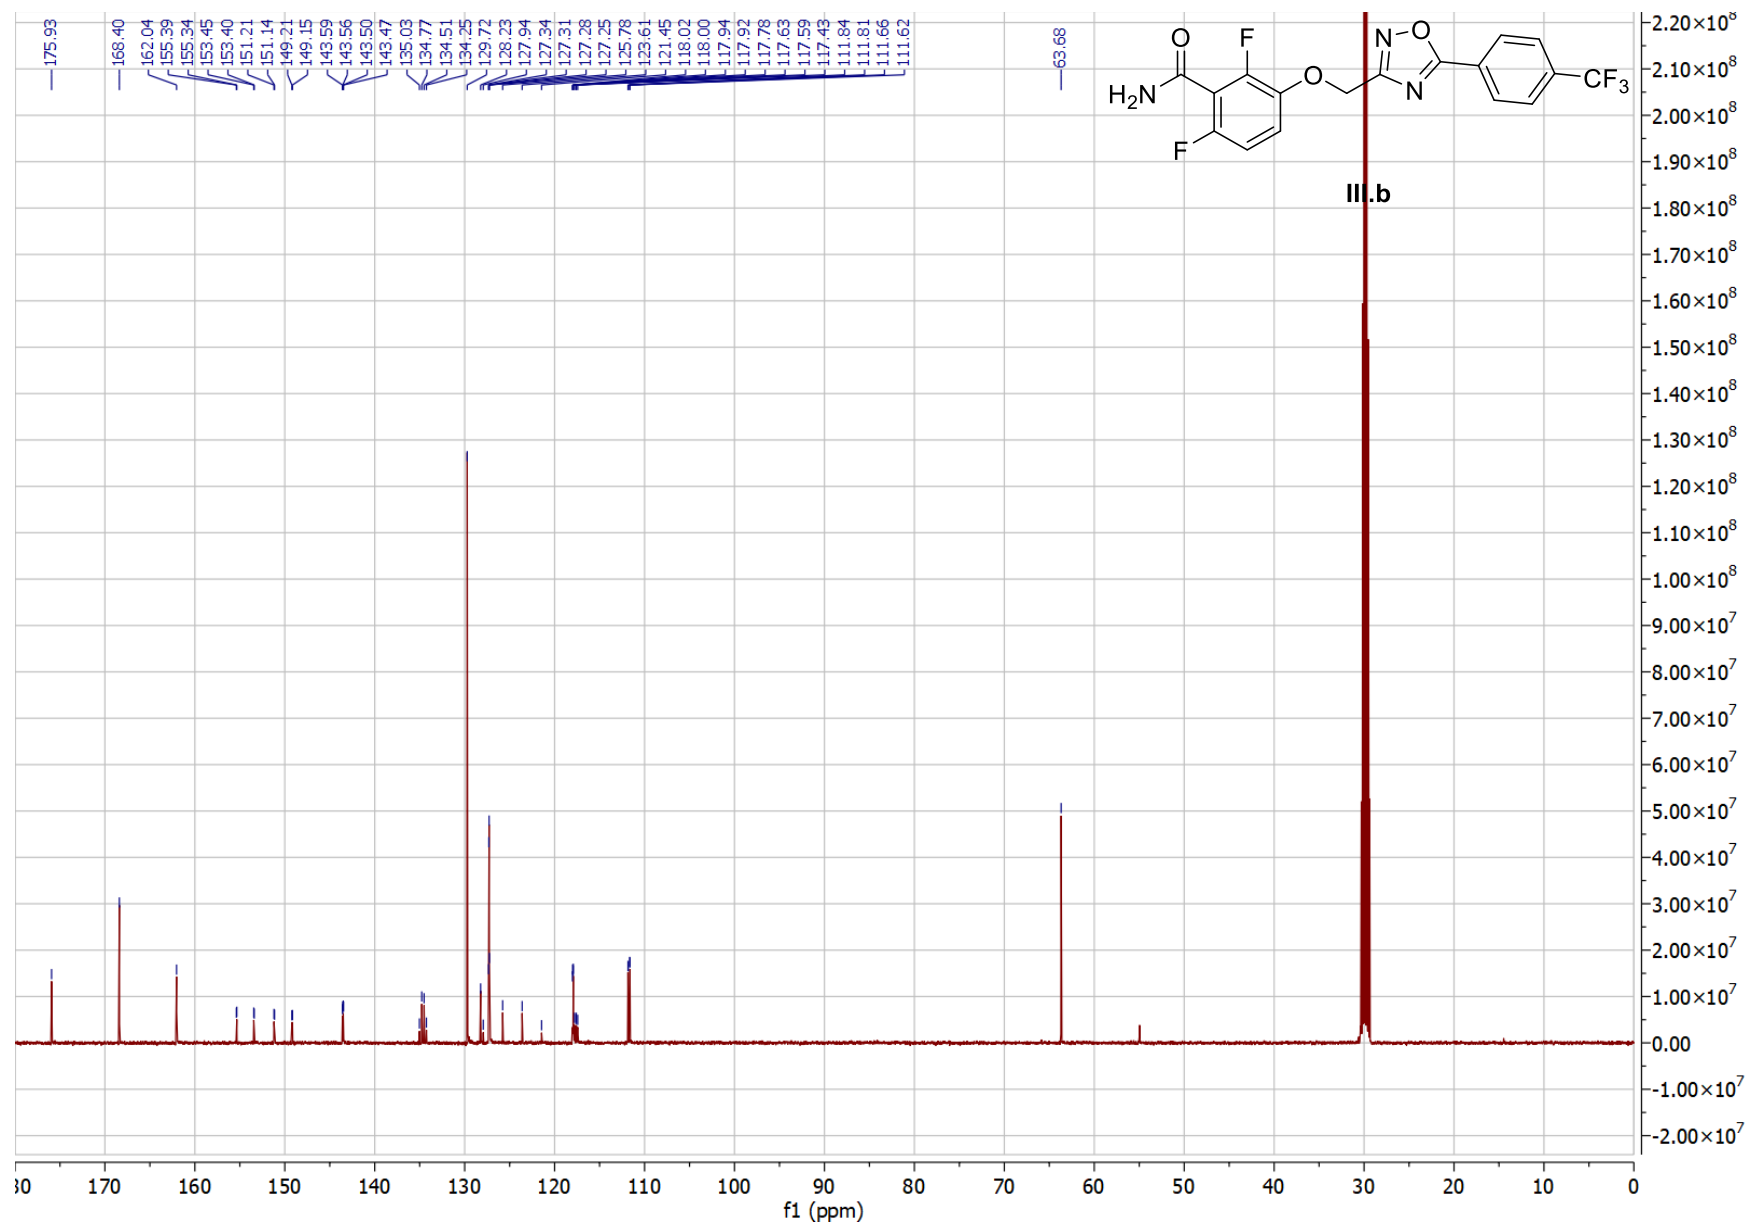

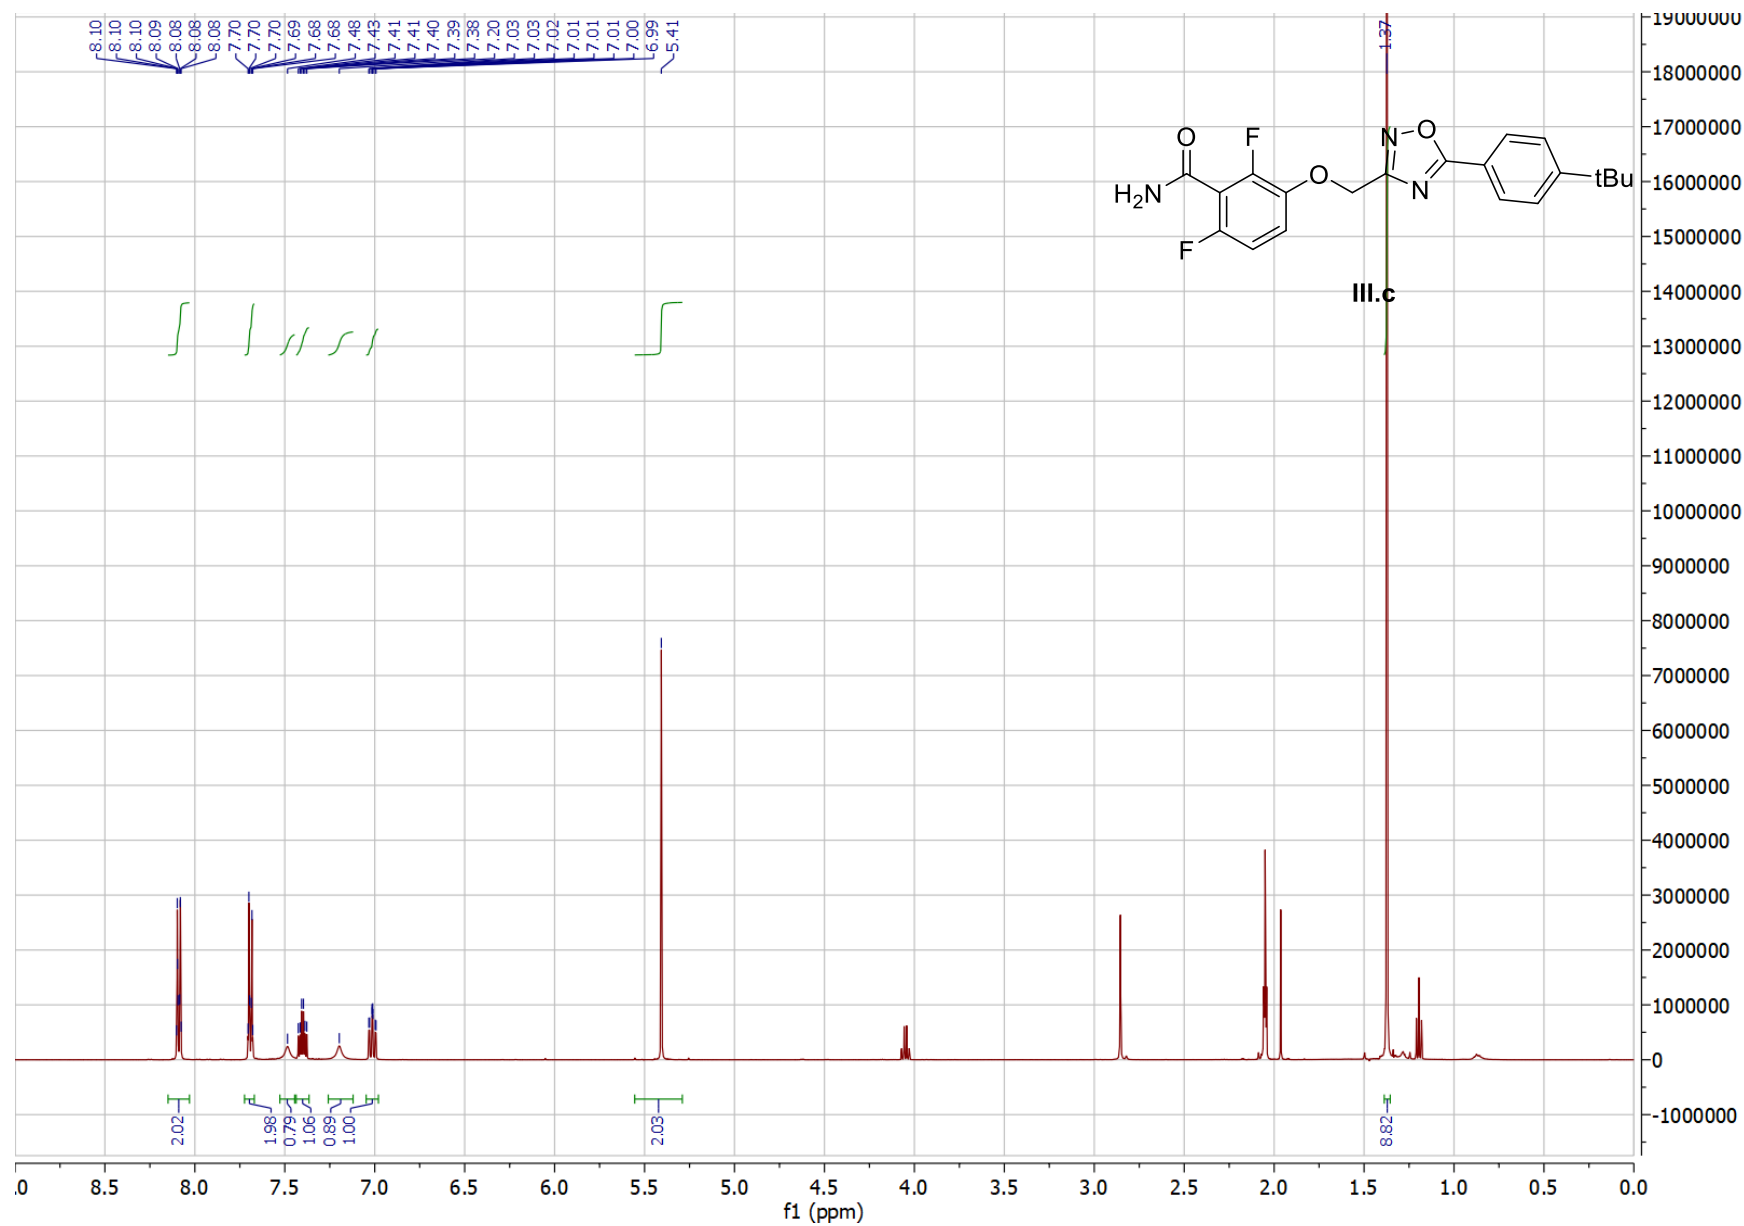

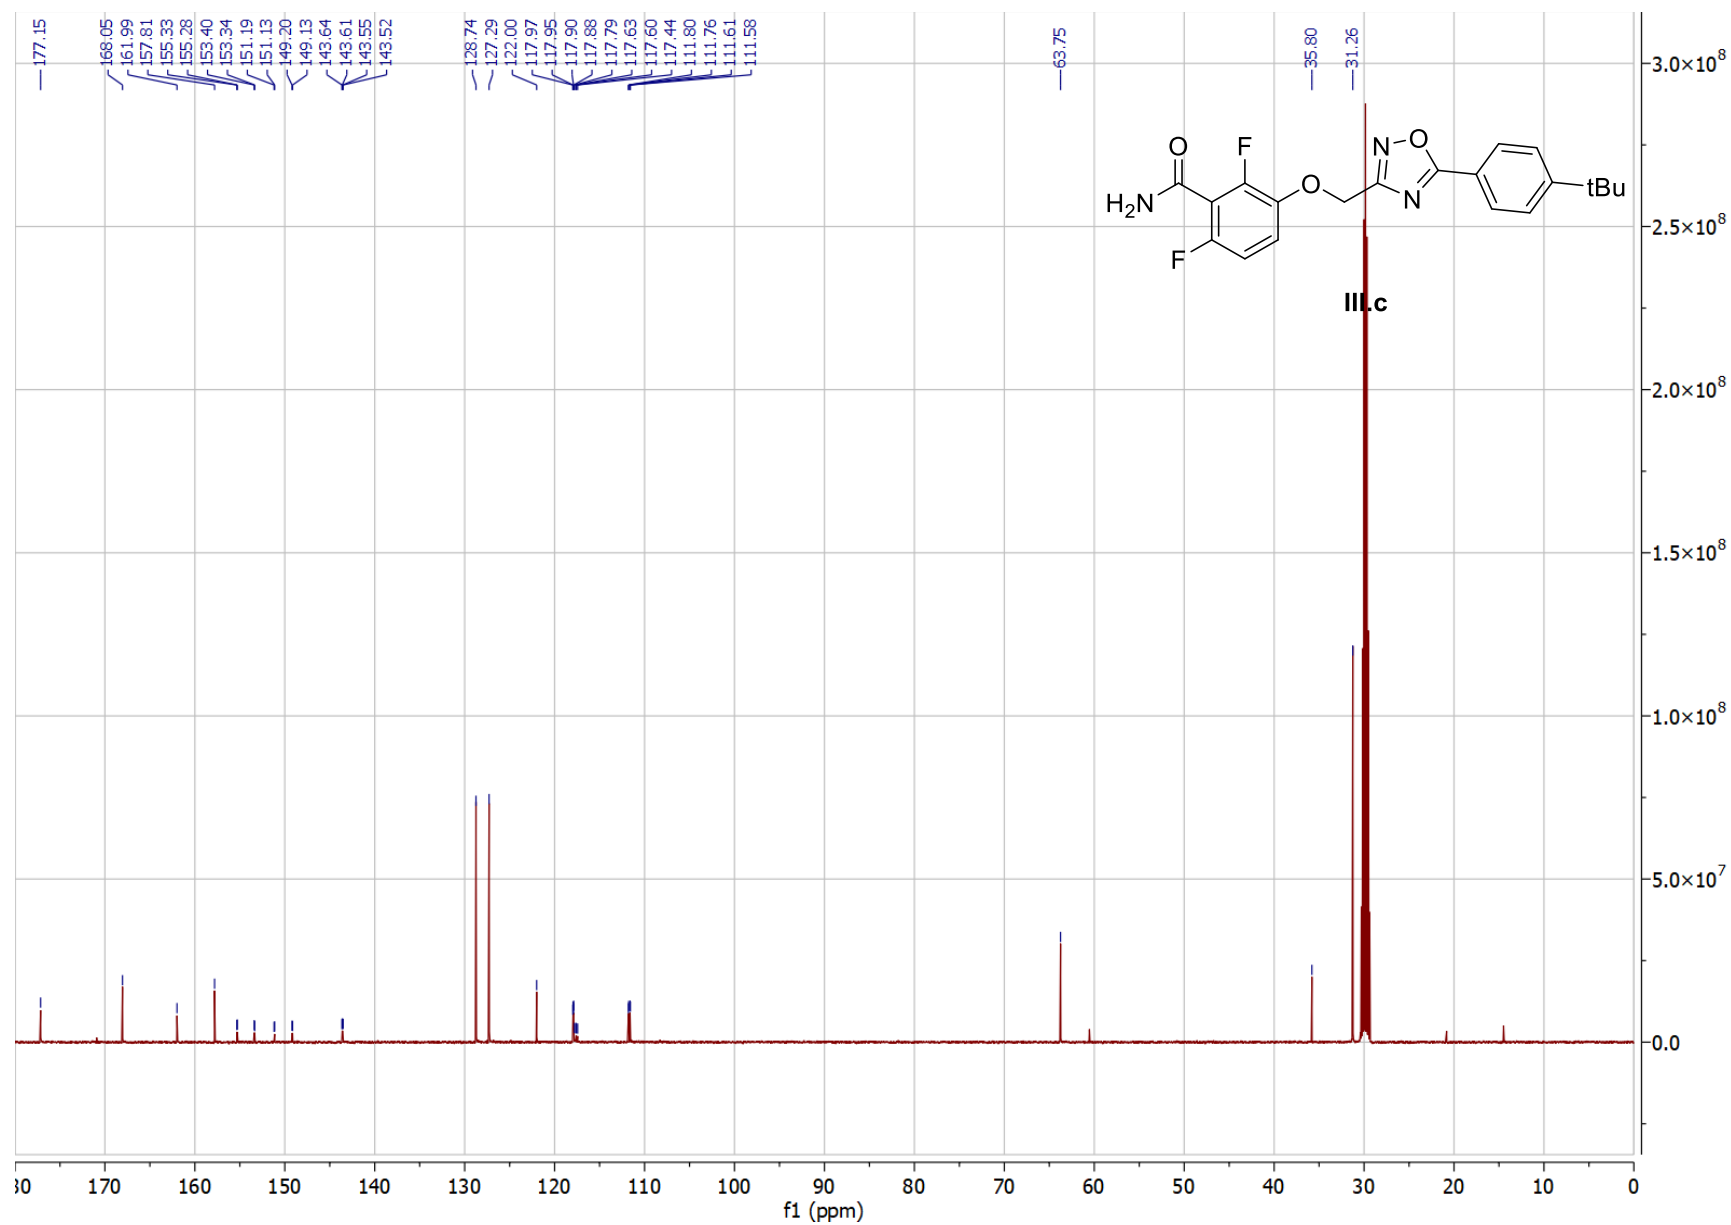

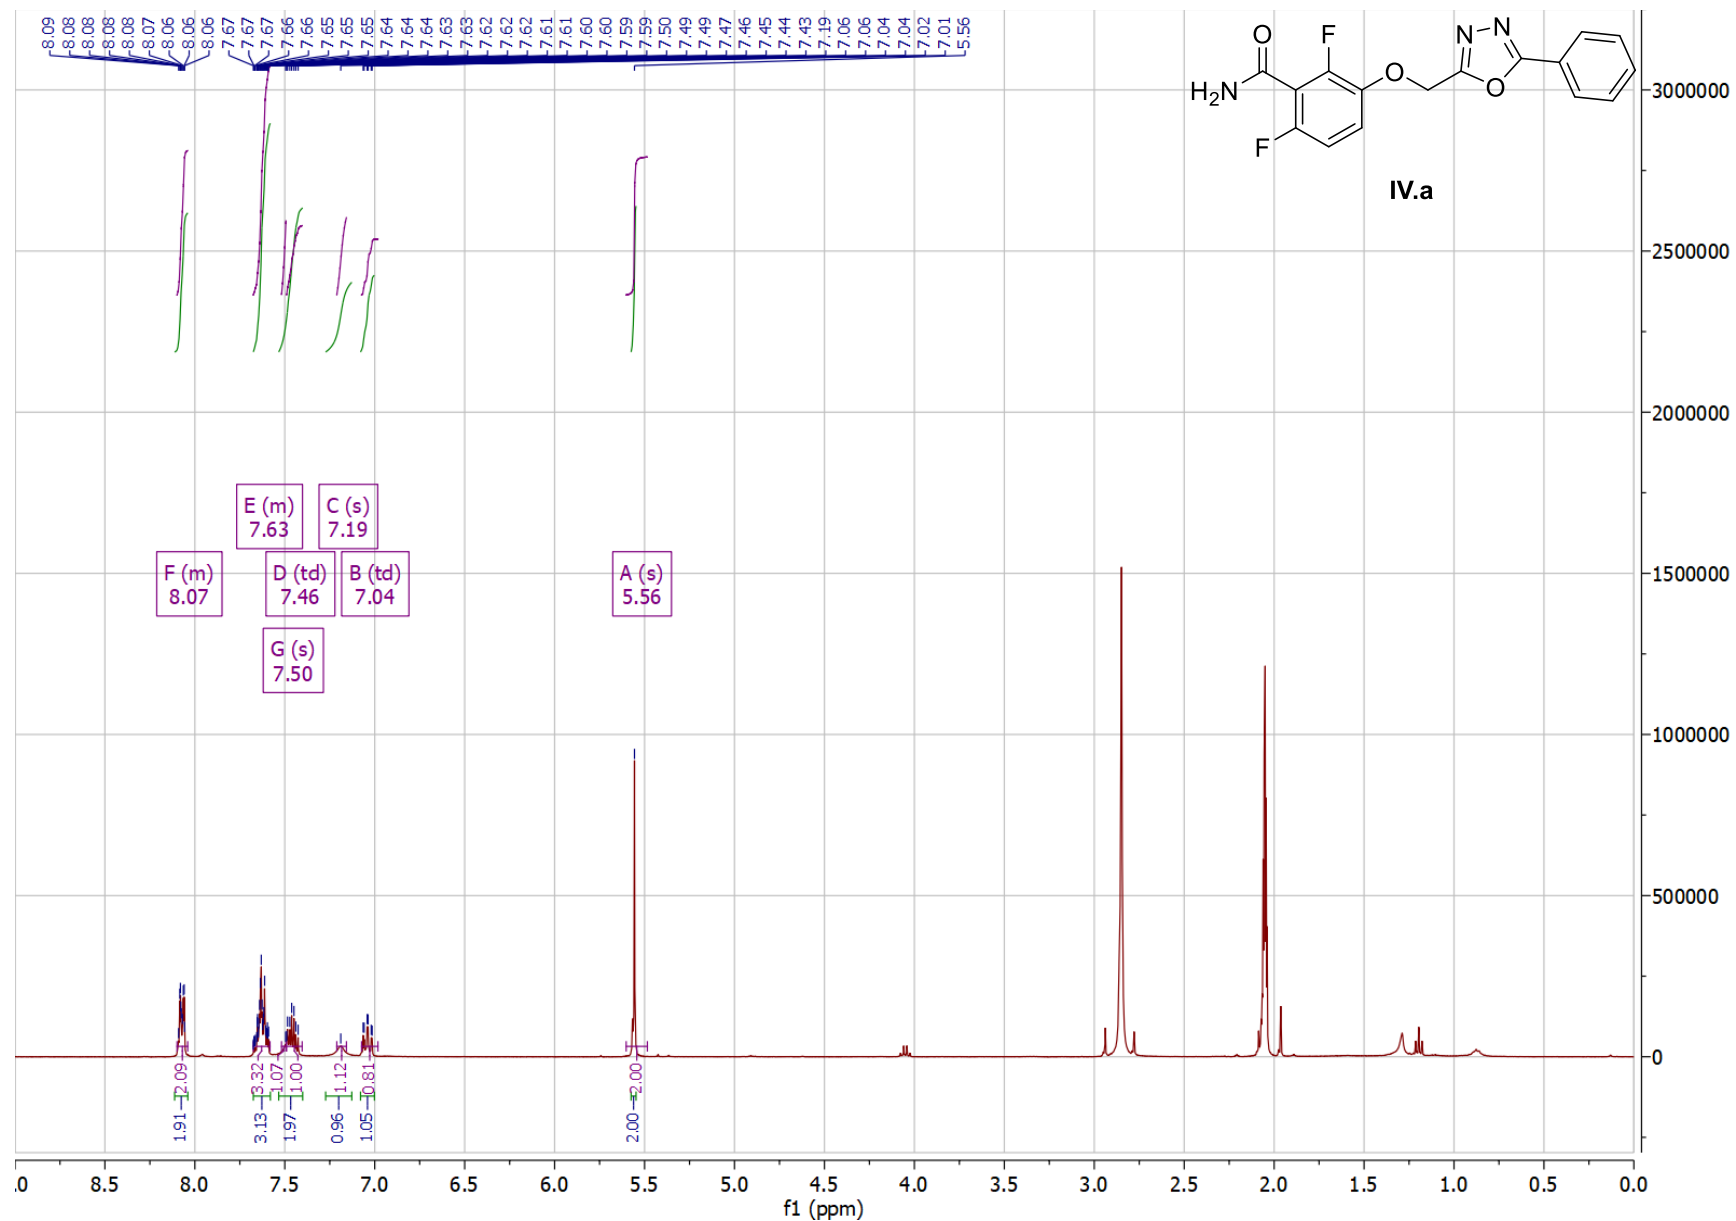

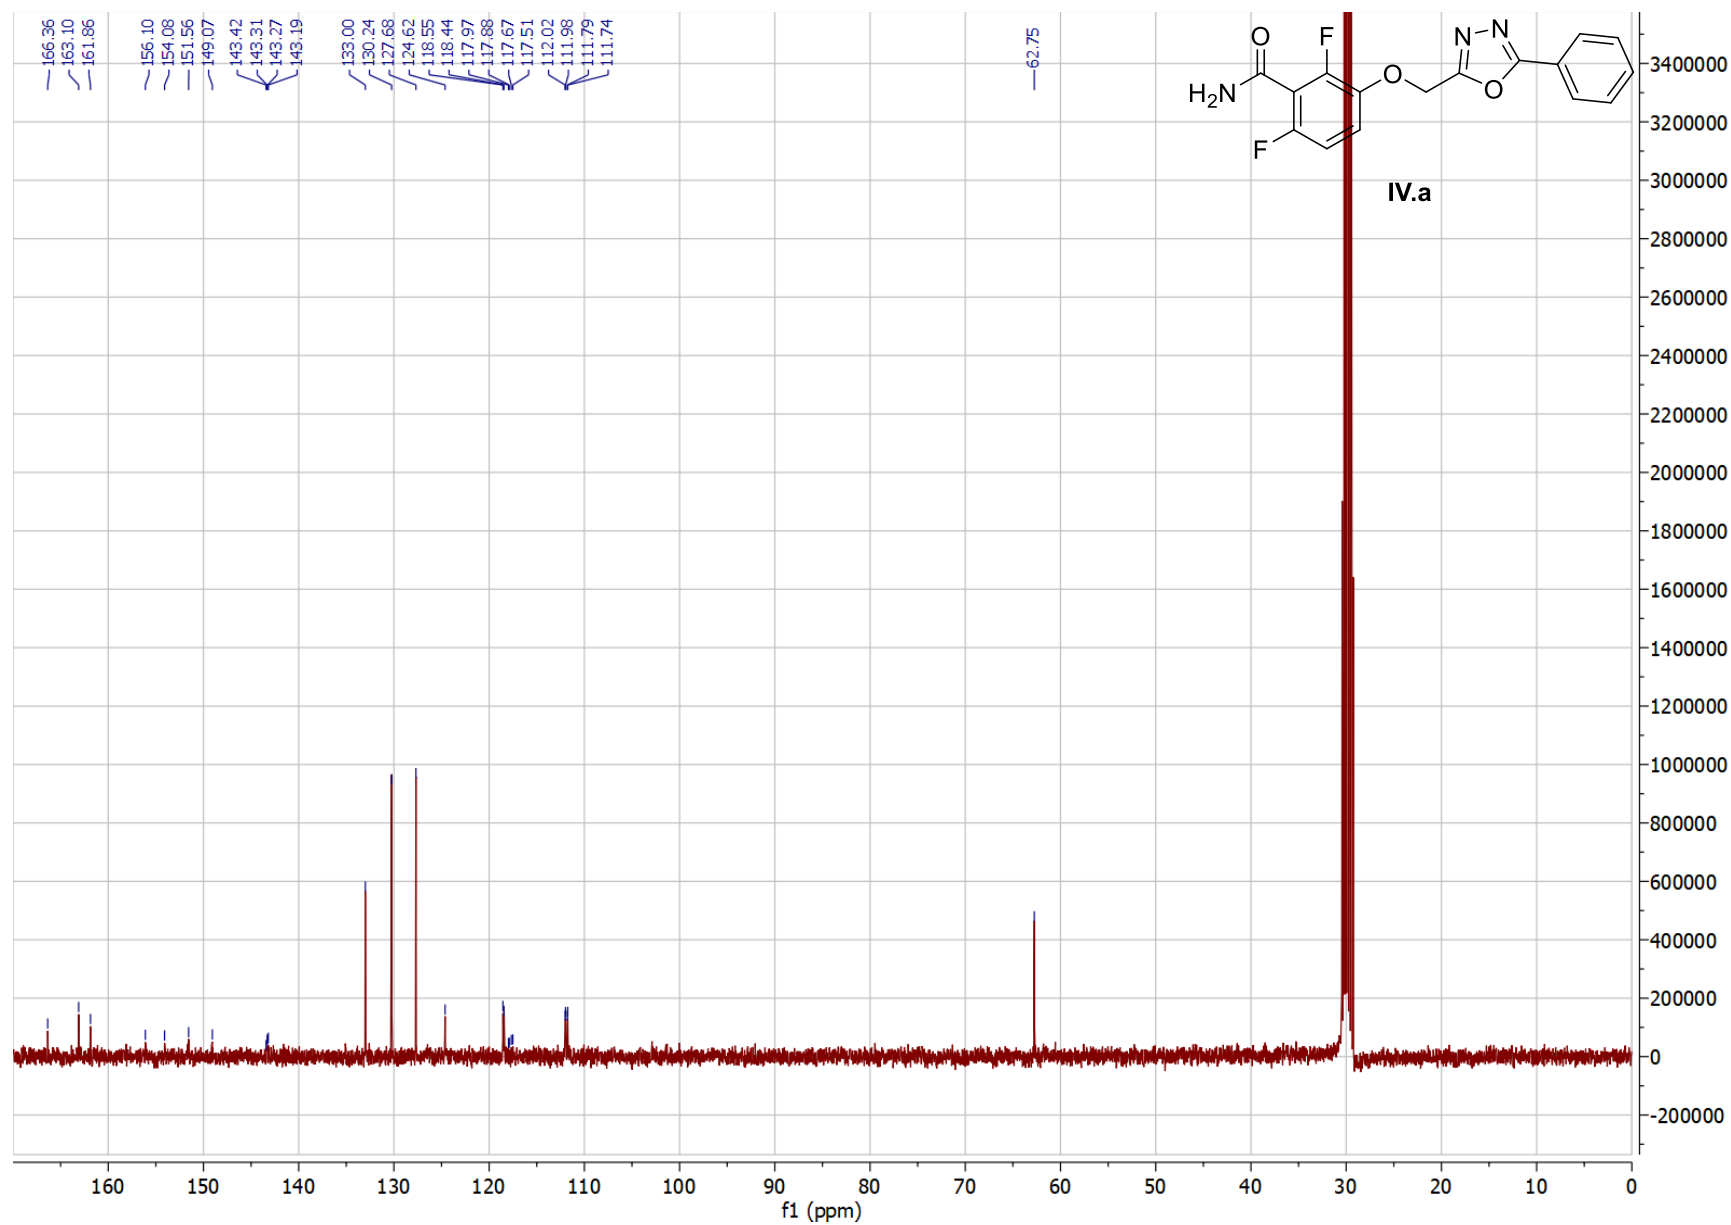

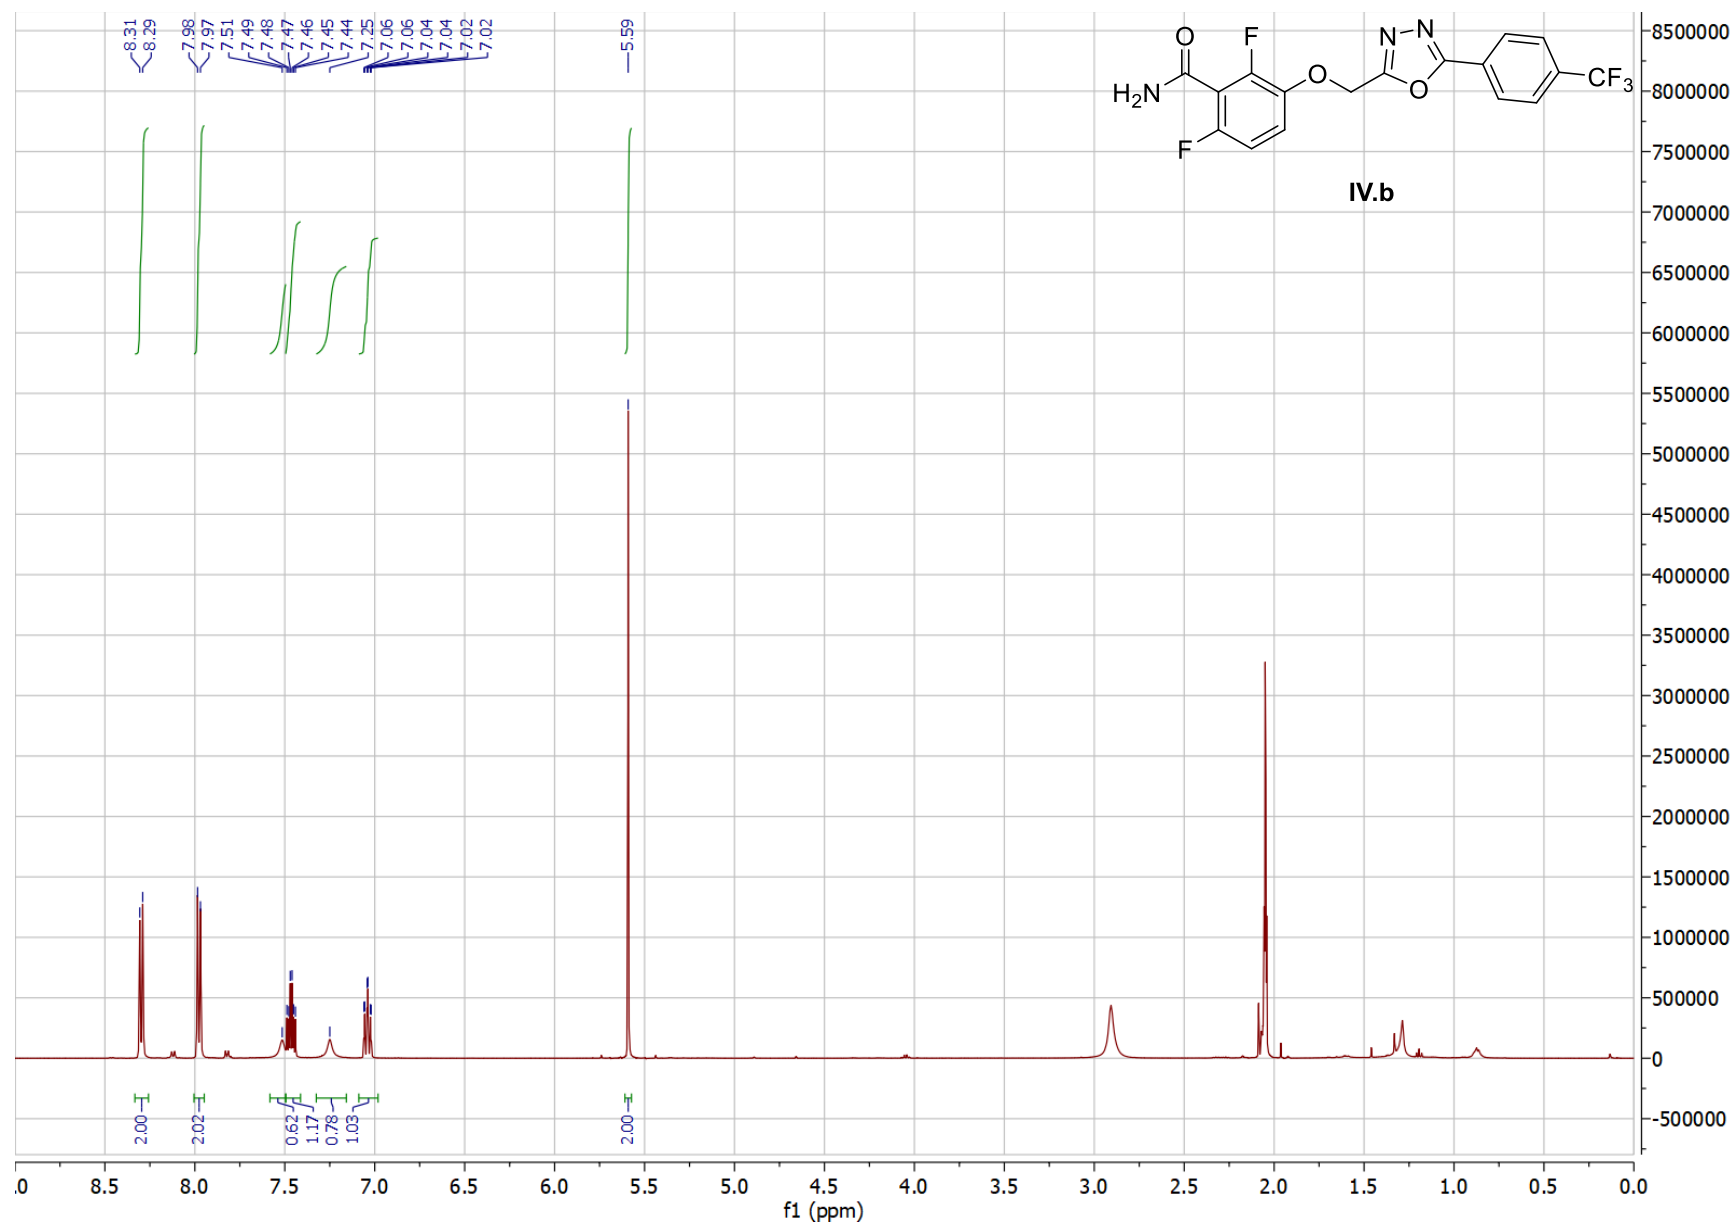

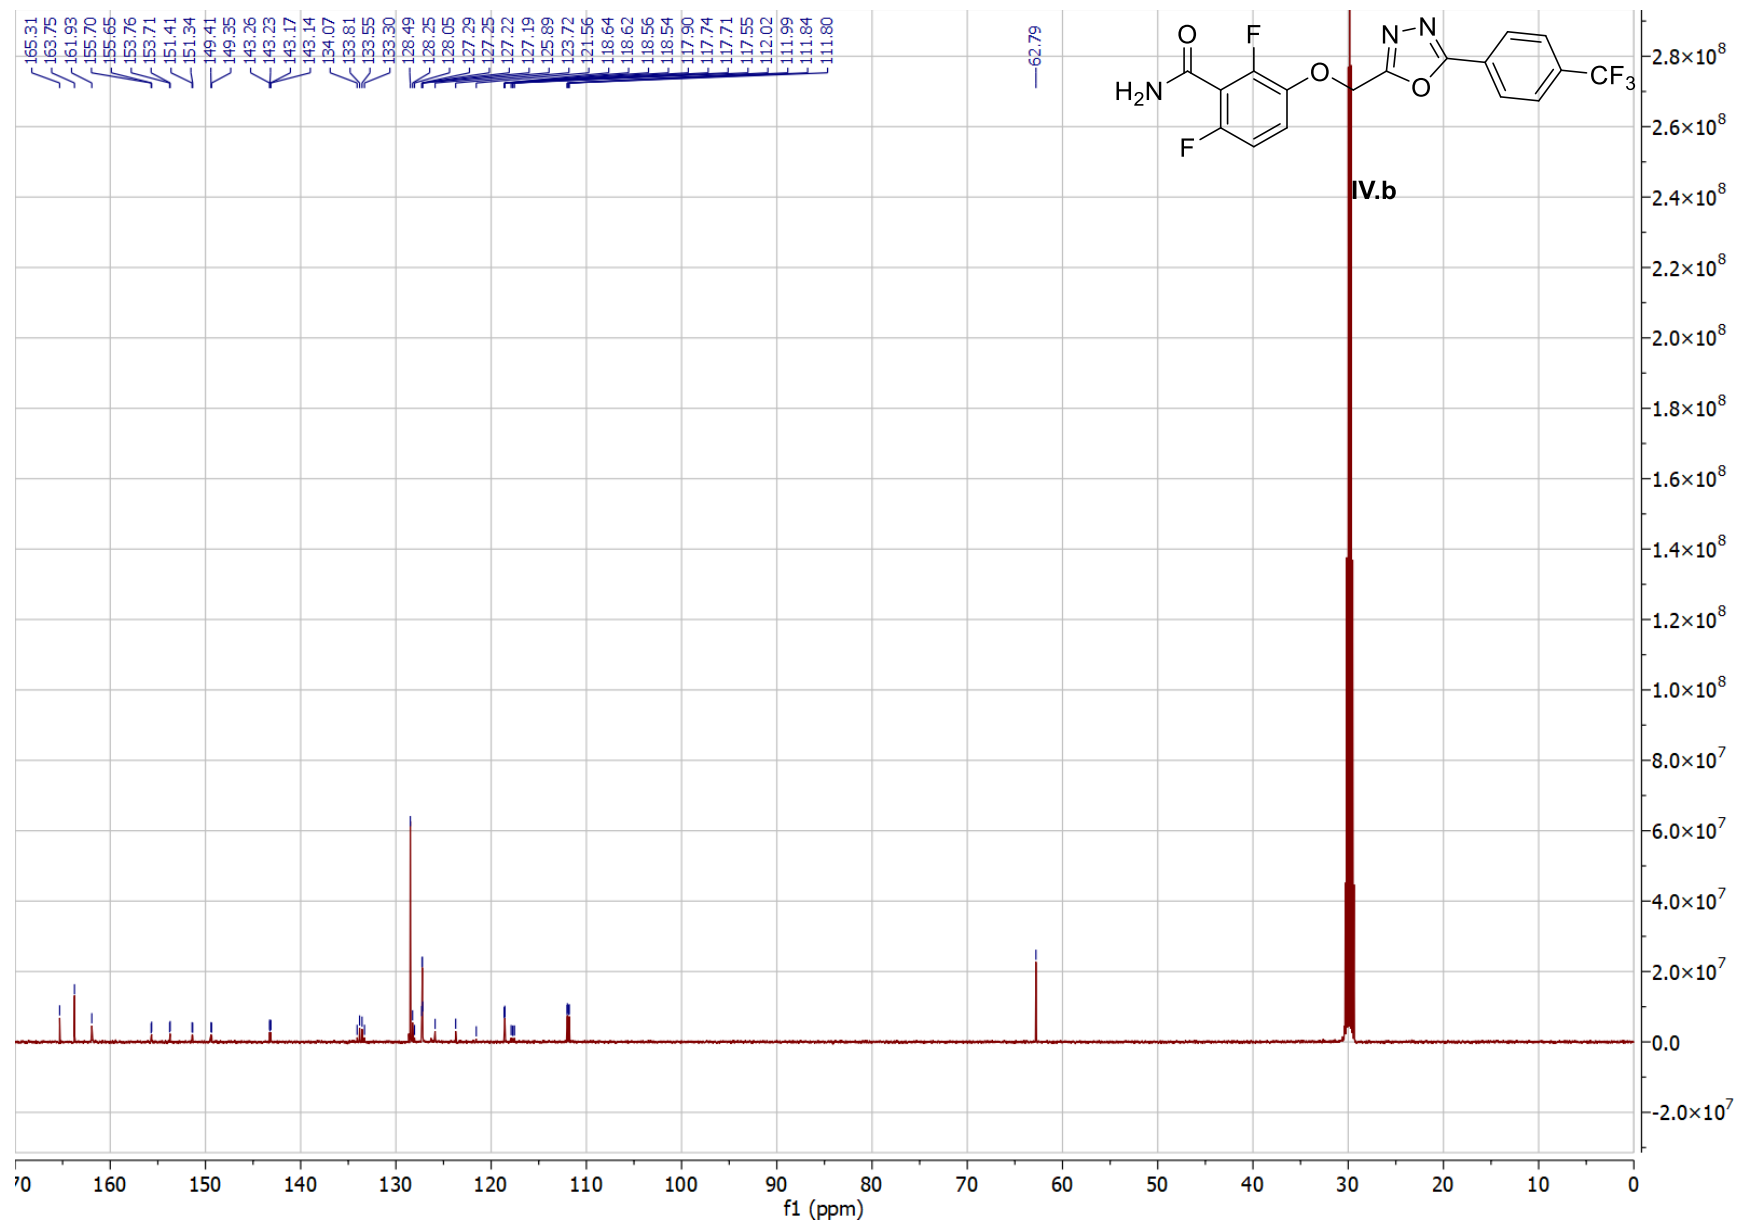



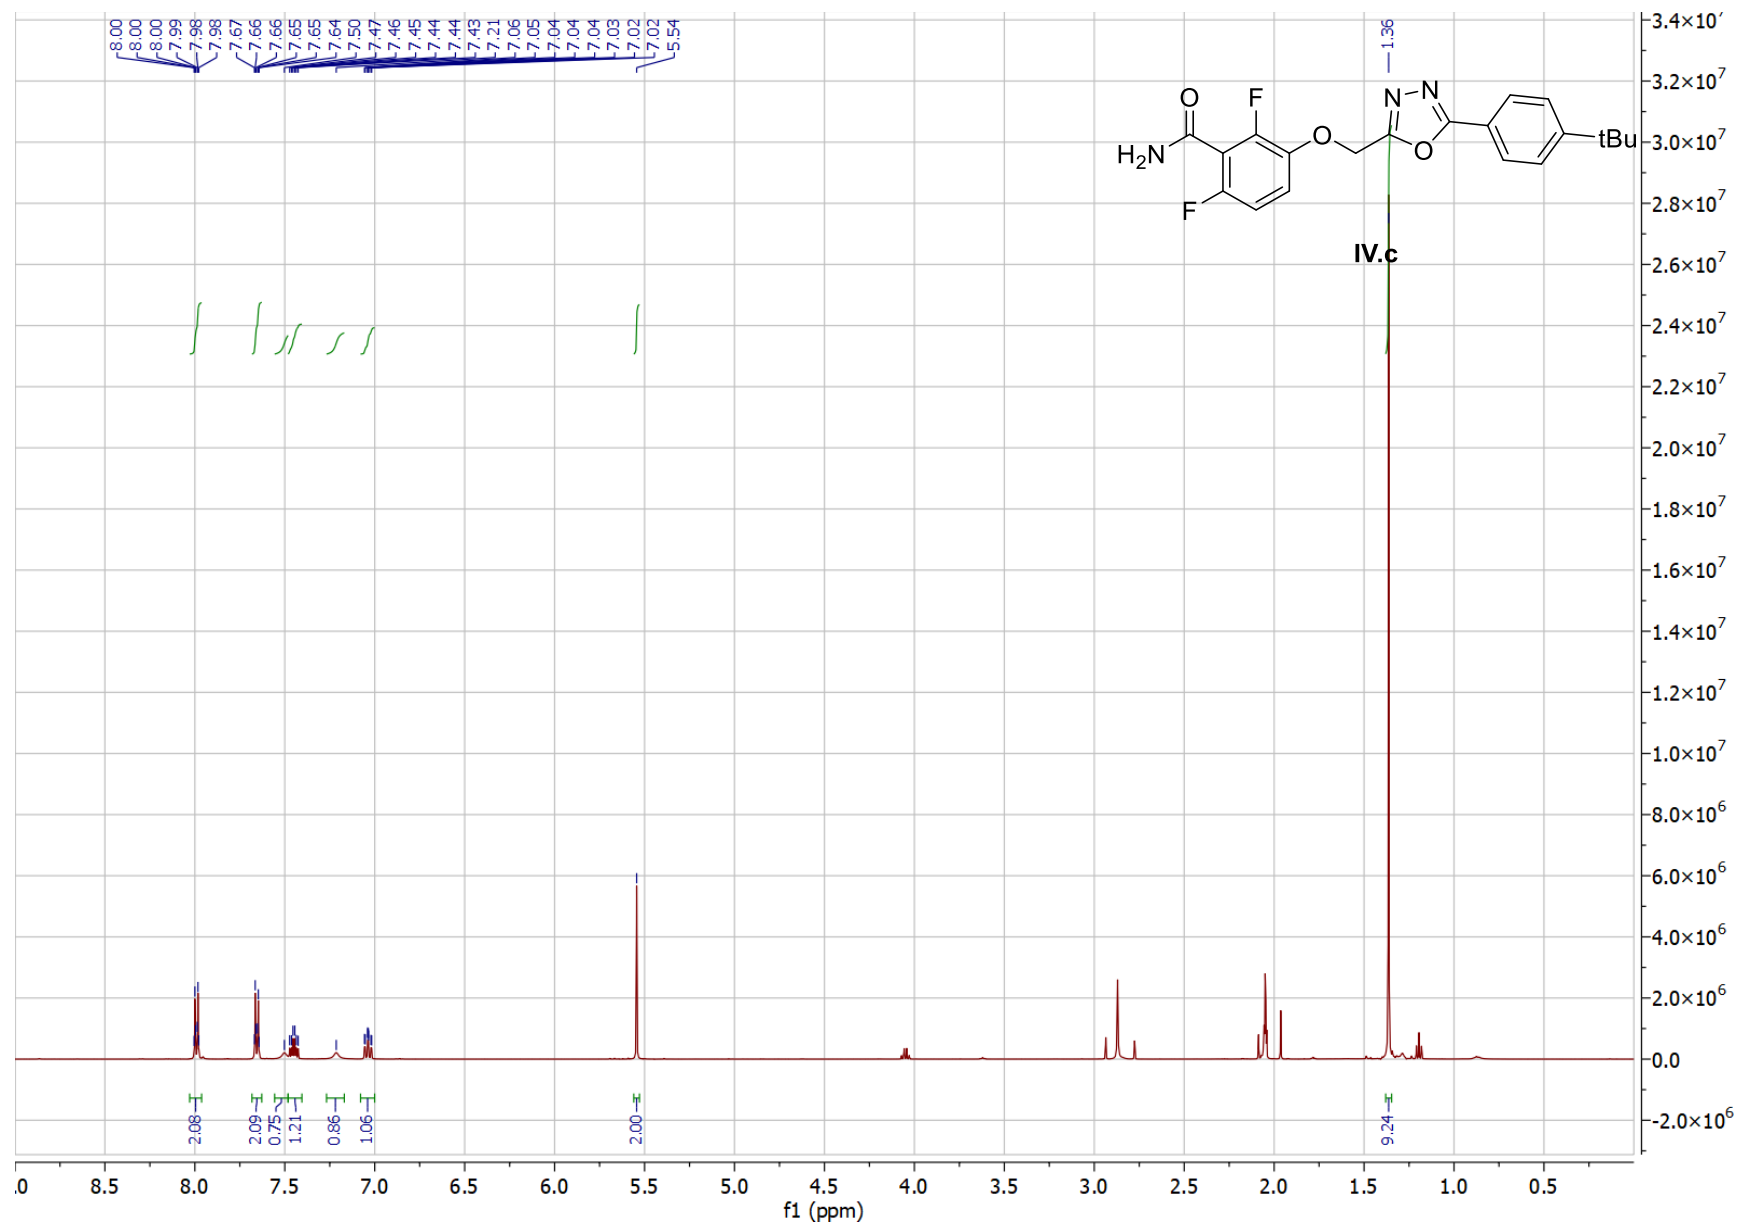

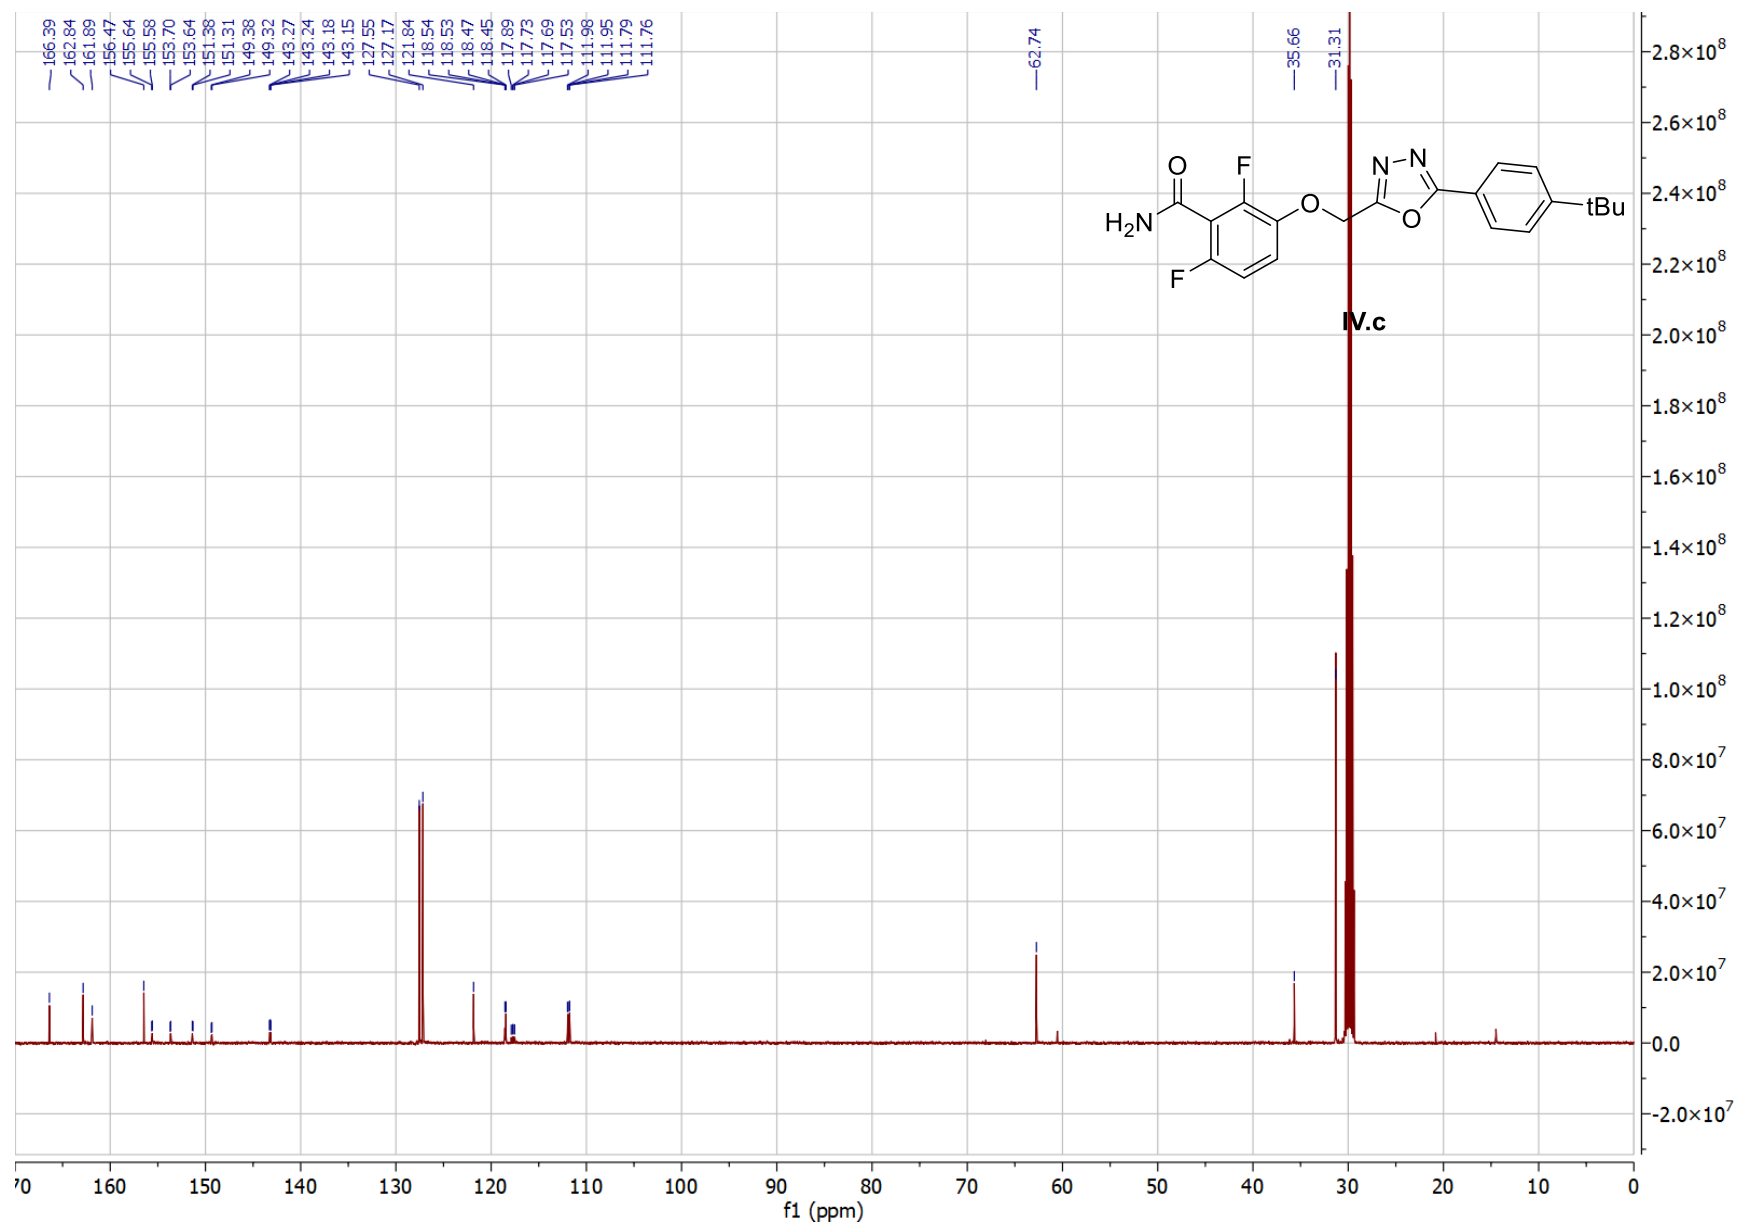

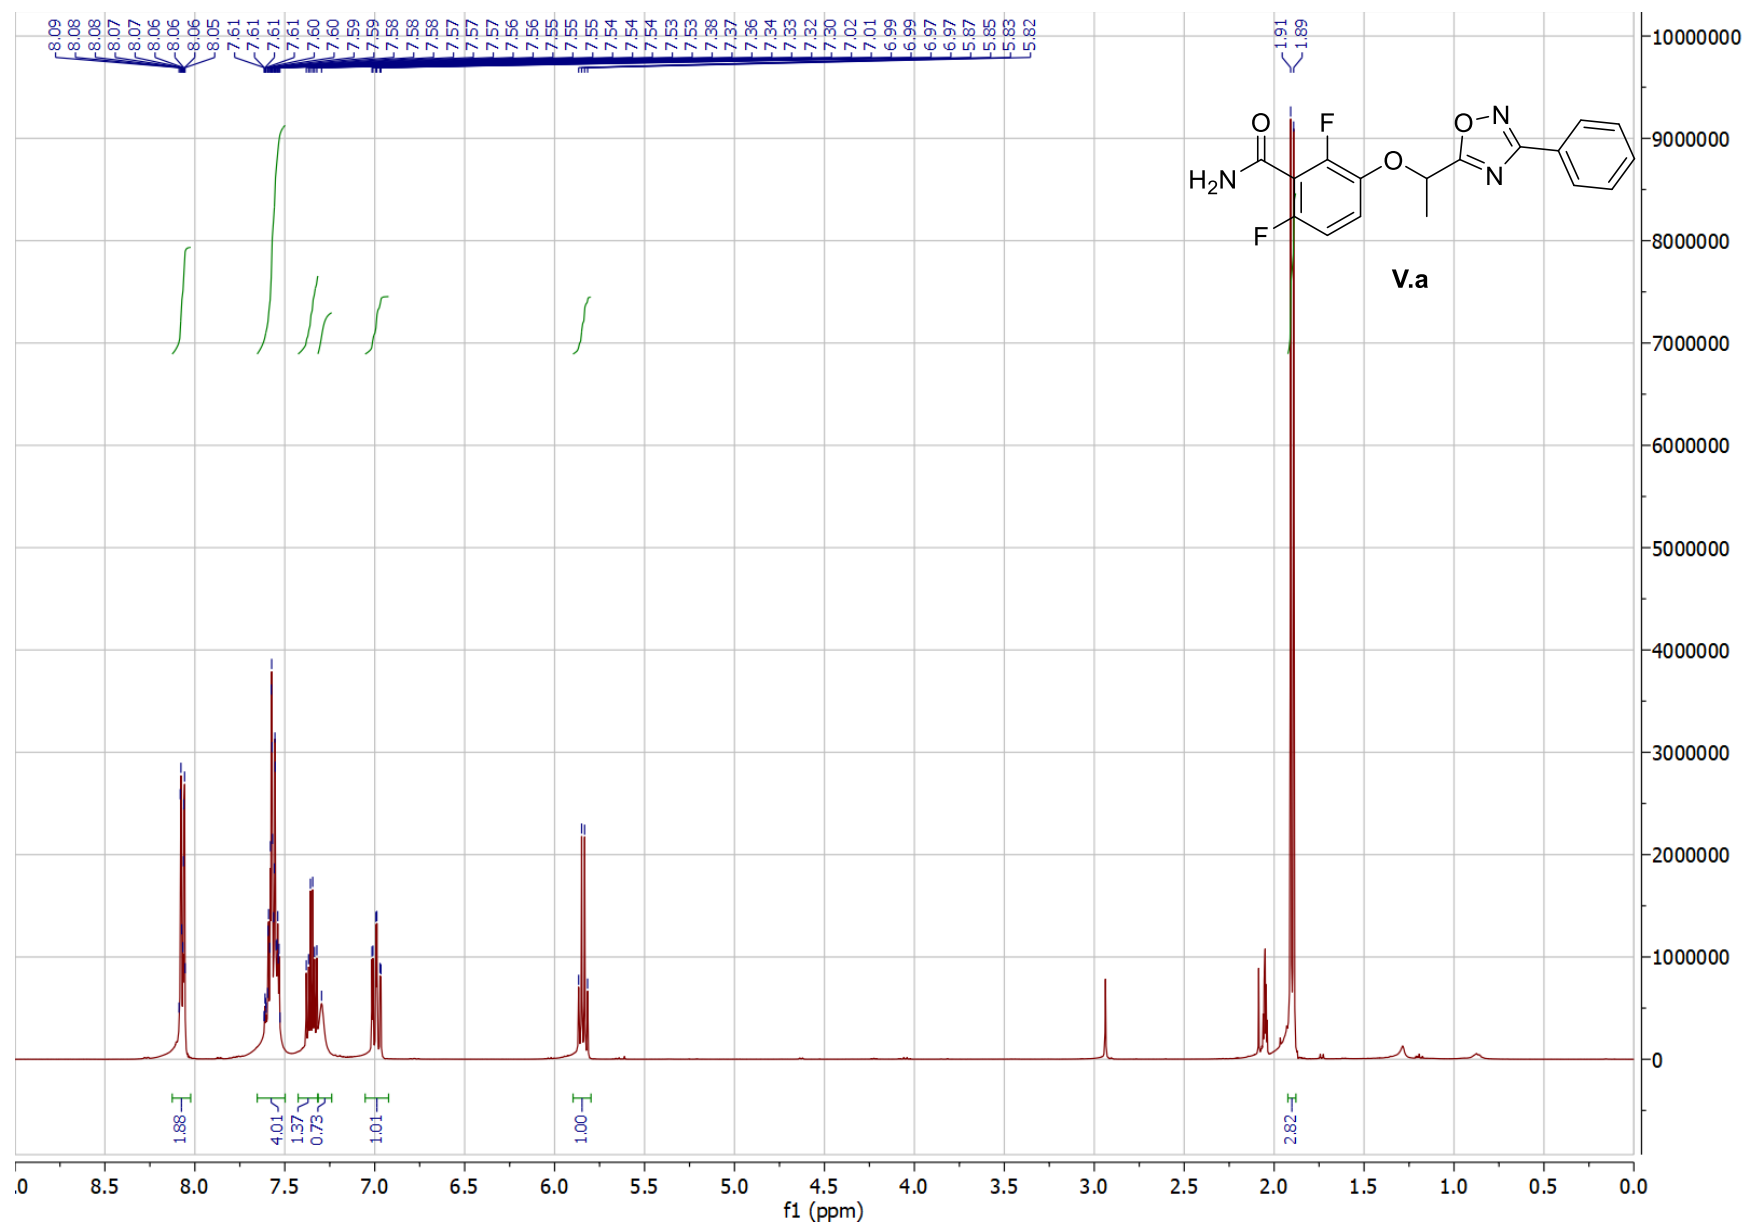

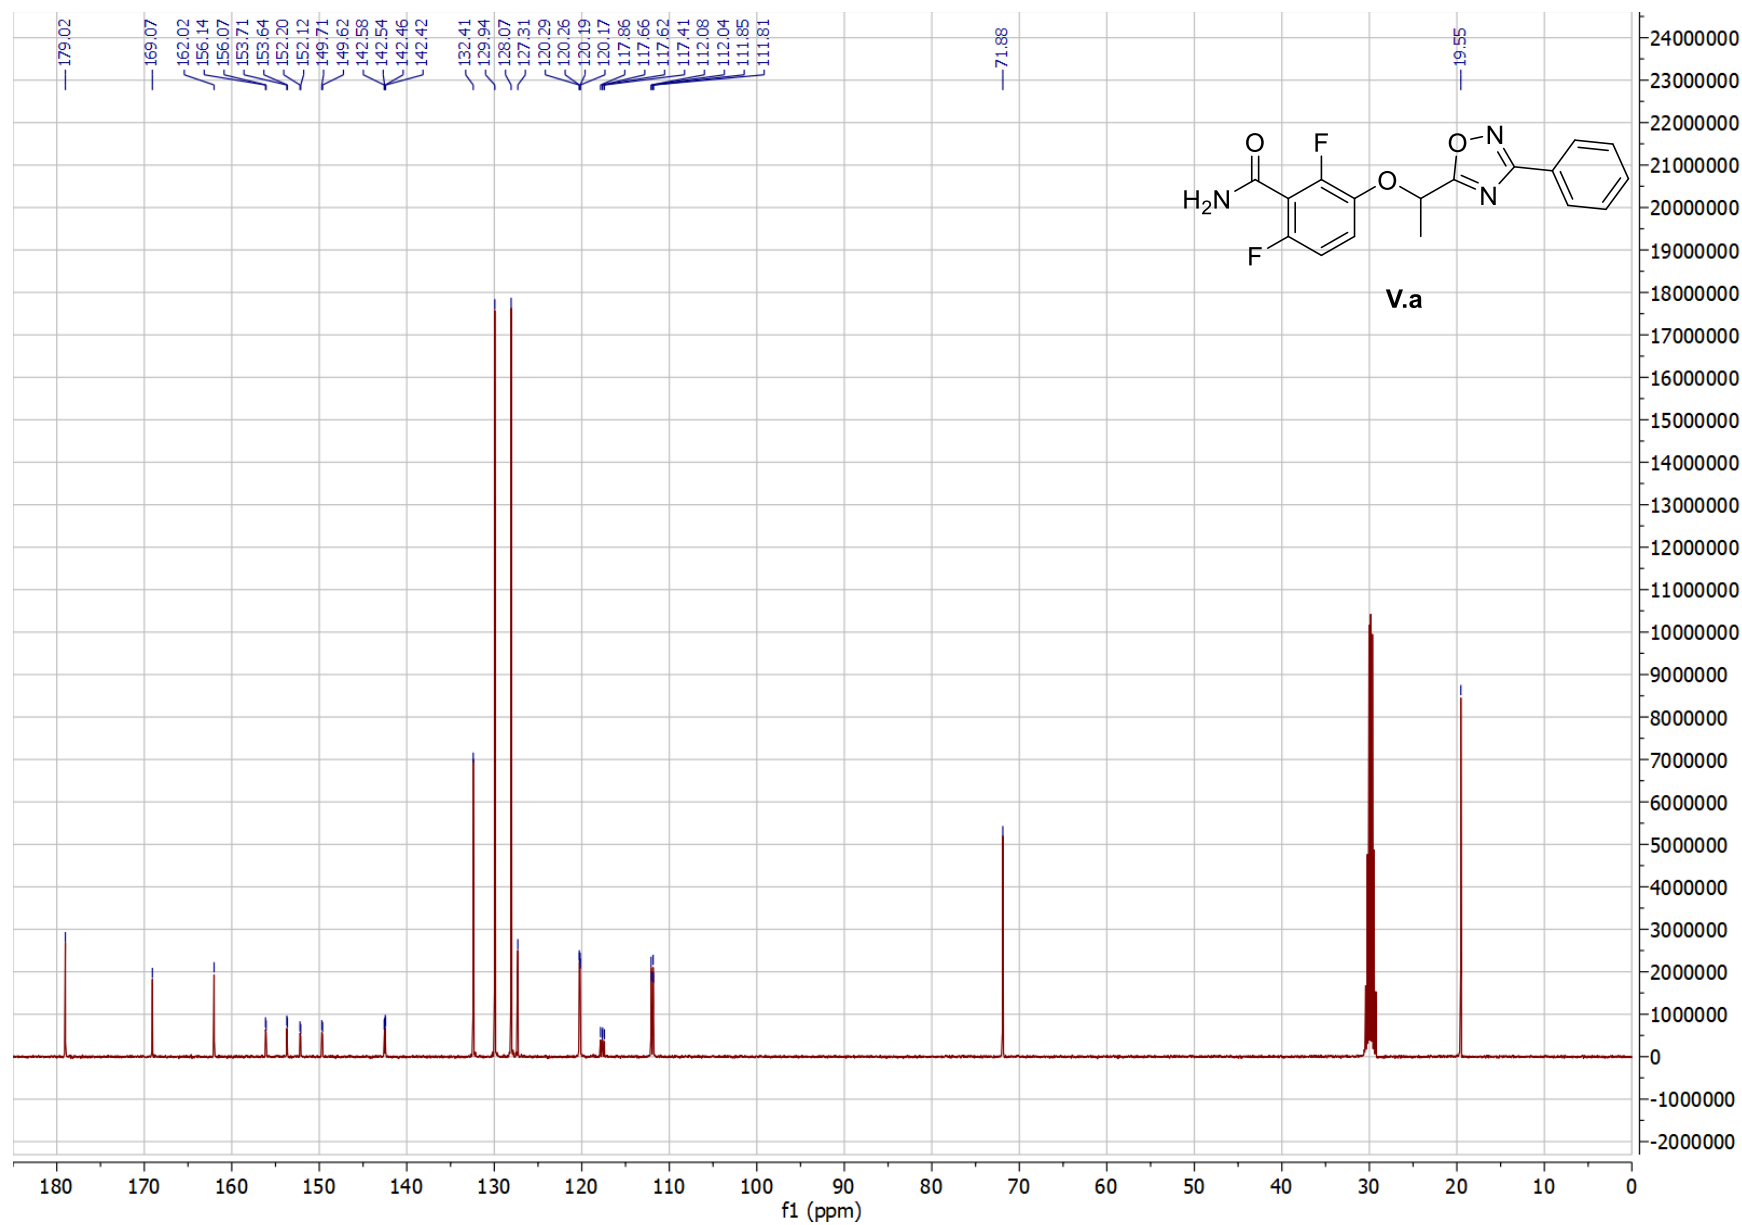

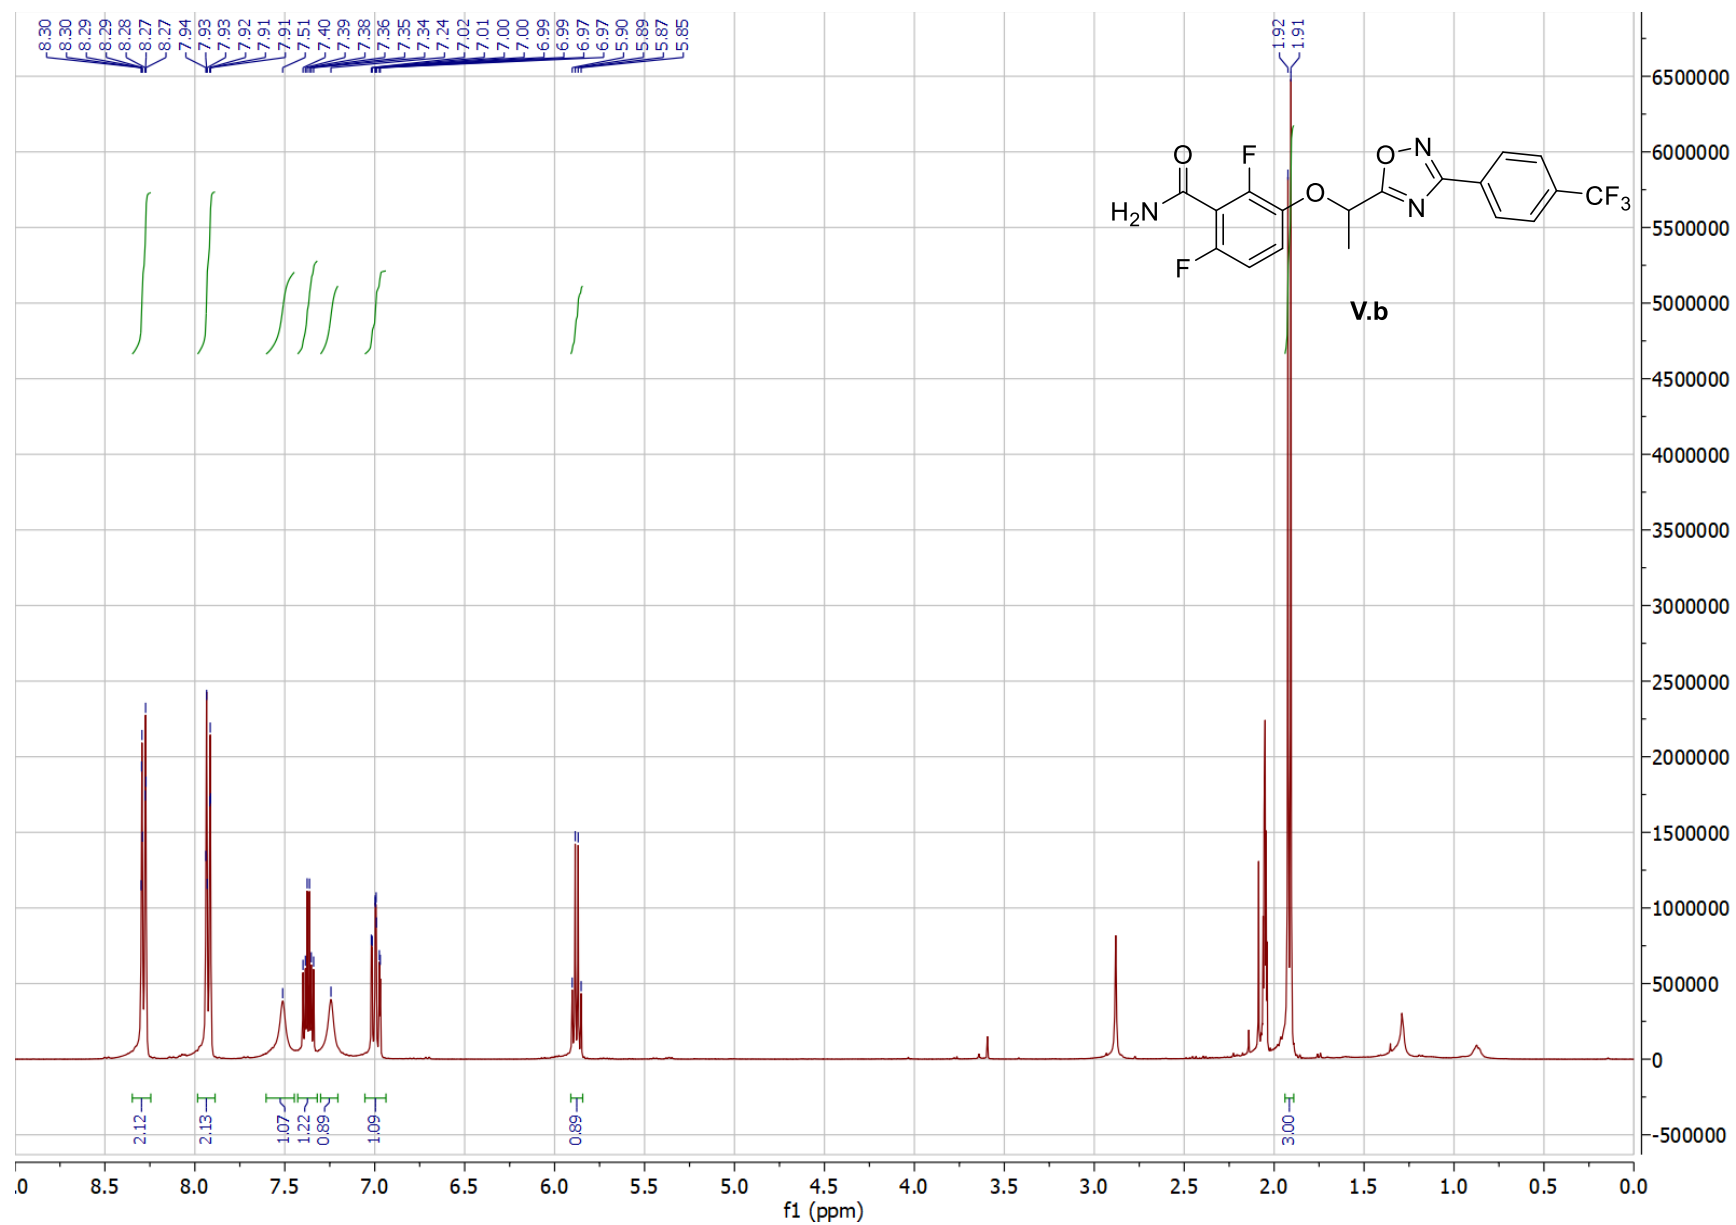

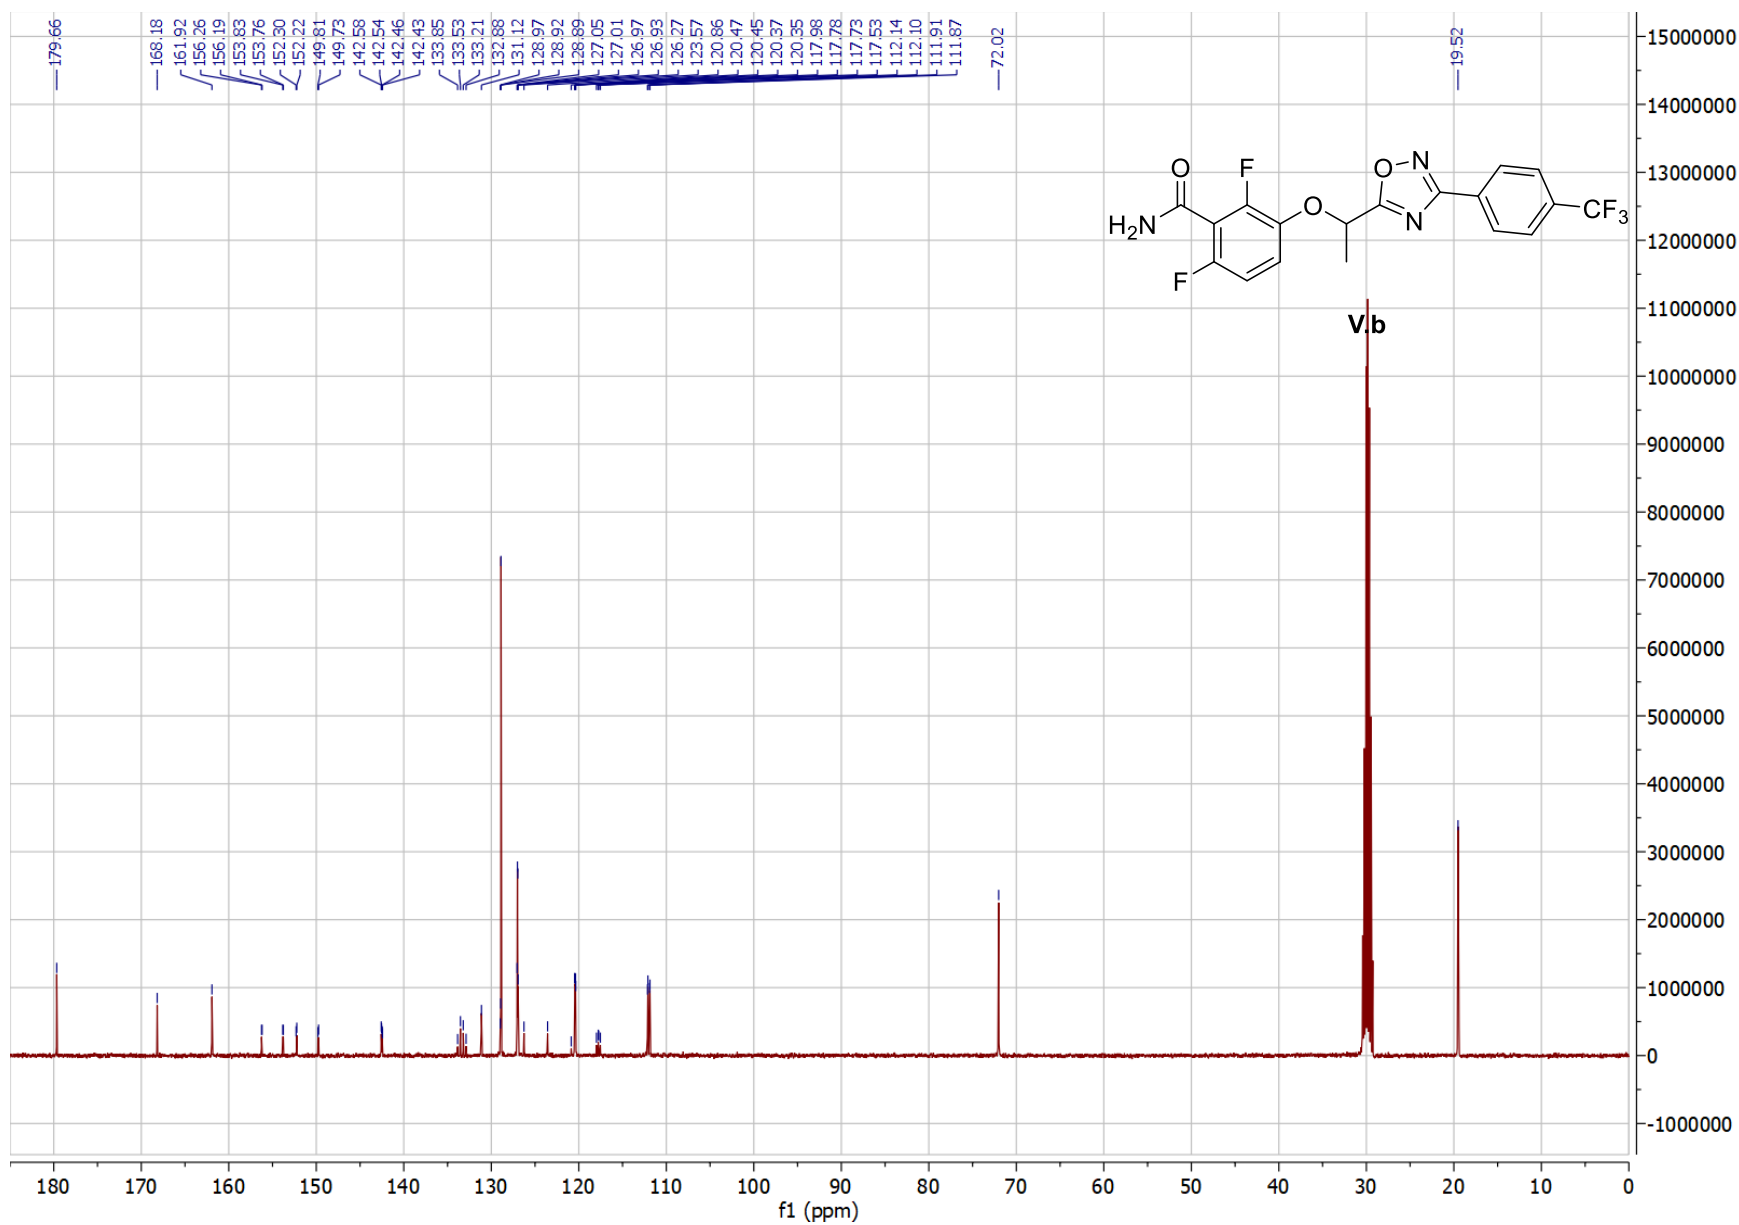

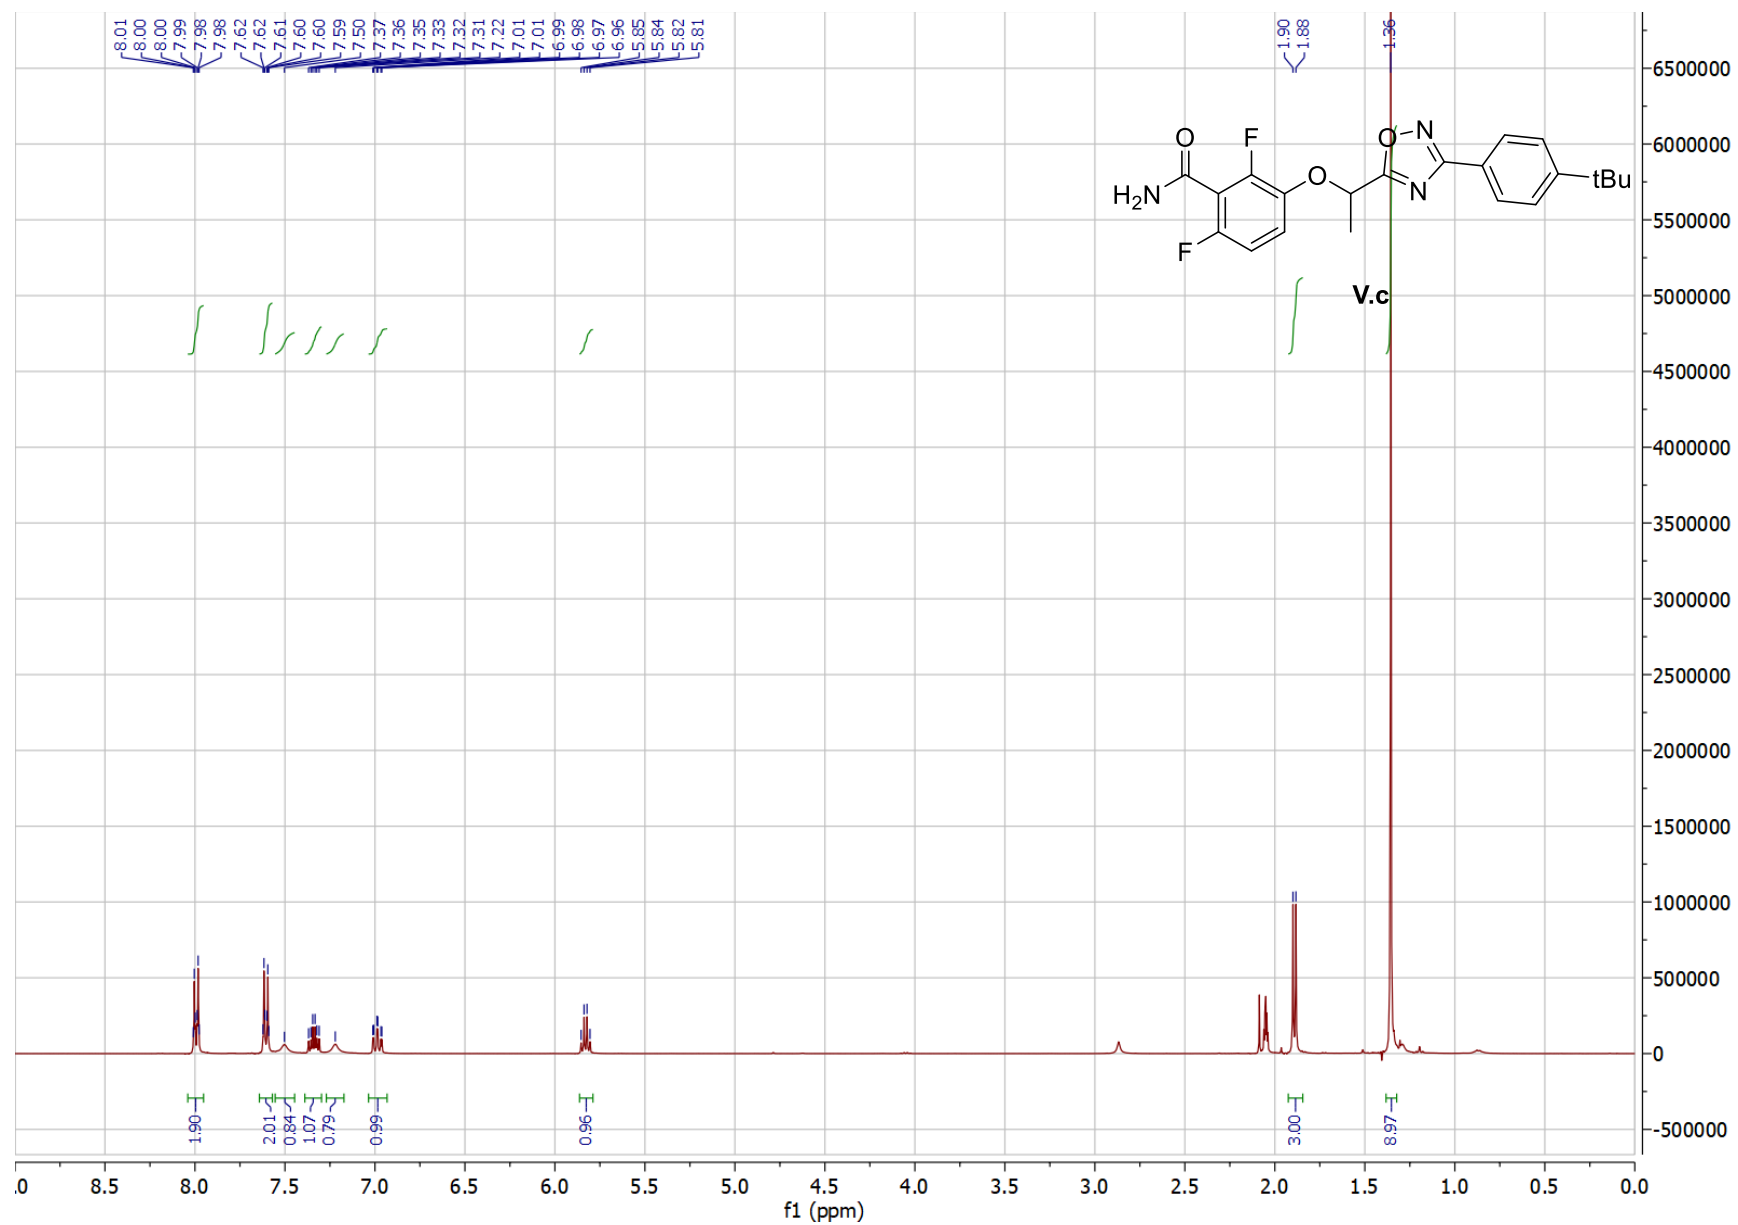

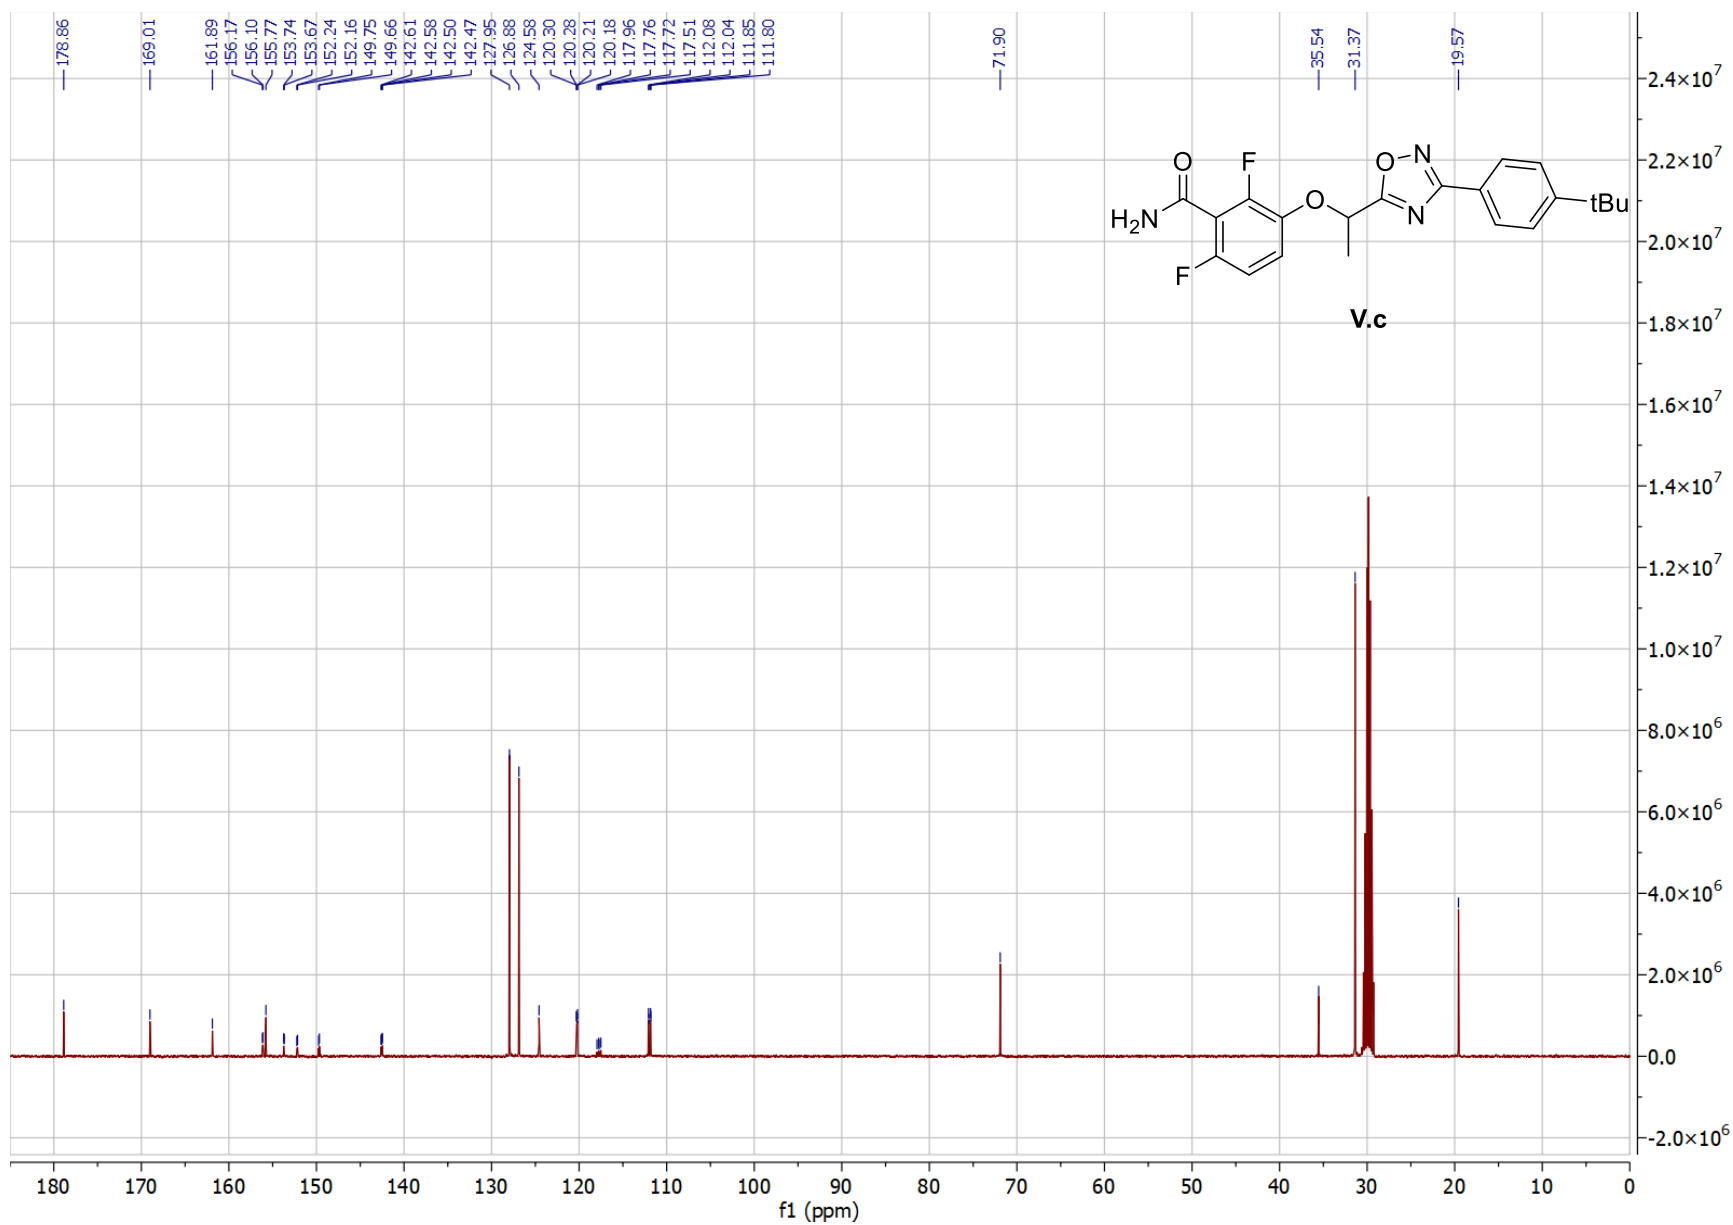

Supplement: s1 [file s1]
